## **Comparative genomics of *Chlamydomonas***

**Rory J. Craig<sup>1,2</sup>, Ahmed R. Hasan<sup>2</sup>, Rob W. Ness<sup>2</sup> & Peter D. Keightley<sup>1</sup>**

1 Institute of Evolutionary Biology, School of Biological Sciences, University of Edinburgh, EH9 3FL, Edinburgh, United Kingdom

2 Department of Biology, University of Toronto Mississauga, Mississauga, Ontario, L5L 1C6, Canada

Correspondence: [rory.craig@ed.ac.uk](mailto:rory.craig@ed.ac.uk)

1 **Abstract**

2

3 Despite its fundamental role as a model organism in plant sciences, the green alga  
4 *Chlamydomonas reinhardtii* entirely lacks genomic resources for any closely related species,  
5 obstructing its development as a study system in several fields. We present highly contiguous  
6 and well-annotated genome assemblies for the two closest known relatives of the species,  
7 *Chlamydomonas incerta* and *Chlamydomonas schloesseri*, and a third more distantly related  
8 species, *Edaphochlamys debaryana*. We find the three *Chlamydomonas* genomes to be highly  
9 syntenous with similar gene contents, although the 129.2 Mb *C. incerta* and 130.2 Mb *C.*  
10 *schloesseri* assemblies are more repeat-rich than the 111.1 Mb *C. reinhardtii* genome. We  
11 identify the major centromeric repeat in *C. reinhardtii* as an L1 LINE transposable element  
12 homologous to Zepp (the centromeric repeat in *Coccomyxa subellipsoidea*) and infer that  
13 centromere locations and structure are likely conserved in *C. incerta* and *C. schloesseri*. We  
14 report extensive rearrangements, but limited gene turnover, between the minus mating-type loci  
15 of the *Chlamydomonas* species, potentially representing the early stages of mating-type  
16 haplotype reformation. We produce an 8-species whole-genome alignment of unicellular and  
17 multicellular volvocine algae and identify evolutionarily conserved elements in the *C. reinhardtii*  
18 genome. We find that short introns (<~100 bp) are extensively overlapped by conserved  
19 elements, and likely represent an important functional class of regulatory sequence in *C.*  
20 *reinhardtii*. In summary, these novel resources enable comparative genomics analyses to be  
21 performed for *C. reinhardtii*, significantly developing the analytical toolkit for this important  
22 model system.

23

24

25

26

27

28

29

30

31

## 32 **Introduction**

33

34 With the rapid increase in genome sequencing over the past two decades, comparative genomics  
35 analyses have become a fundamental tool in biological research. As the first sets of genomes for  
36 closely related eukaryotic species became available, pioneering comparative studies led to  
37 refined estimates of gene content and orthology, provided novel insights into the evolution of  
38 genome architecture and the extent of genomic synteny between species, and enabled the  
39 proportions of genomes evolving under evolutionary constraint to be estimated for the first time  
40 (Mouse Genome Sequencing Consortium 2002; Cliften et al. 2003; Stein et al. 2003; Richards et  
41 al. 2005). As additional genomes were sequenced it became possible to produce multiple species  
42 whole-genome alignments (WGA) and to identify conserved elements (CEs) in noncoding  
43 regions for several of the most well-studied lineages (Siepel et al. 2005; Stark et al. 2007;  
44 Gerstein et al. 2010; Lindblad-Toh et al. 2011). Many of these conserved noncoding sequences  
45 overlap regulatory elements, and the identification of CEs has proved to be among the most  
46 accurate approaches for discovering functional genomic sequences (Alföldi and Lindblad-Toh  
47 2013). As a result, CEs have frequently been used to enhance genome annotation projects and to  
48 study several aspects of regulatory sequence evolution (Mikkelsen et al. 2007; Lowe et al. 2011;  
49 Halligan et al. 2013; Williamson et al. 2014).

50

51 The ability to perform comparative analyses is contingent on the availability of genome  
52 assemblies for species that span a range of appropriate evolutionary distances. While this state  
53 has been achieved for the majority of model organisms, there remain several species of high  
54 biological significance that entirely lack genomic resources for any closely related species. Hiller  
55 et al. (2013) described such cases as ‘phylogenetically isolated genomes’, specifically referring  
56 to species for which the most closely related genomes belong to species divergent by one or  
57 more substitutions, on average, per neutrally evolving site. At this scale of divergence an  
58 increasingly negligible proportion of the genome can be aligned at the nucleotide-level  
59 (Margulies et al. 2006), limiting comparative analyses to the protein-level and impeding the  
60 development of such species as model systems in numerous research areas.

61

62 The unicellular green alga *Chlamydomonas reinhardtii* is a long-standing model organism across  
63 several fields, including cell biology, plant physiology and molecular biology, and algal  
64 biotechnology (Salomé and Merchant 2019). Because of its significance, the ~110 Mb haploid  
65 genome of *C. reinhardtii* was among the earliest eukaryotic genomes to be sequenced (Grossman  
66 et al. 2003; Merchant et al. 2007), and both the genome assembly and annotation are actively  
67 being developed and improved (Blaby et al. 2014). Despite its quality and extensive application,  
68 the *C. reinhardtii* genome currently meets the ‘phylogenetically isolated’ definition. The closest  
69 confirmed relatives of *C. reinhardtii* that have genome assemblies belong to the clade of  
70 multicellular algae that includes *Volvox carteri*, the *Tetrabaenaceae-Goniaceae-Volvocaceae*, or  
71 TGV clade. Collectively, *C. reinhardtii* and the TGV clade are part of the highly diverse order  
72 Volvocales, and the more taxonomically limited clades *Reinhardtinia* and core-*Reinhardtinia*  
73 (Nakada et al. 2008; Nakada et al. 2016). Although these species are regularly considered close  
74 relatives, multicellularity likely originated in the TGV clade over 200 million years ago (Herron  
75 et al. 2009), and *C. reinhardtii* and *V. carteri* are more divergent from one another than human is  
76 to chicken (Prochnik et al. 2010).

77  
78 Without a comparative genomics framework, the wider application of *C. reinhardtii* as a model  
79 system is severely impeded. While this broadly applies to the general functional annotation of  
80 the genome as outlined above (e.g. refinement of gene models and annotation of CEs), it is  
81 particularly relevant to the field of molecular evolution. Although the evolutionary biology of *C.*  
82 *reinhardtii* has not been widely studied, the species has several features that have attracted recent  
83 attention to its application in this field. Its haploid state, high genetic diversity (~2% genome-  
84 wide (Craig et al. 2019)) and experimental tractability make it an excellent system to study the  
85 fundamental evolutionary processes of mutation (Ness et al. 2015; Ness et al. 2016),  
86 recombination (Liu et al. 2018; Hasan and Ness 2020), and selection (Böndel et al. 2019).  
87 However, without genomic resources for closely related species it is currently impossible to  
88 perform several key analyses, such as the comparison of substitution rates at synonymous and  
89 non-synonymous sites of protein-coding genes (i.e. calculating dN/dS), and the inference of  
90 ancestral states at polymorphic sites (a requirement of several population and quantitative  
91 genetics models (Keightley and Jackson 2018)).

92

93 Furthermore, *V. carteri* and its relatives in the TGV clade are extensively used to study the  
94 evolution of multicellularity and other major evolutionary transitions (e.g. isogamy to  
95 anisogamy), and five genomes of multicellular species spanning a range of organismal  
96 complexities have now been assembled (Prochnik et al. 2010; Hanschen et al. 2016; Featherston  
97 et al. 2018; Hamaji et al. 2018). These studies have often included analyses of gene family  
98 evolution, reporting expansions in families thought to be functionally related to multicellularity.  
99 While these analyses have undoubtedly made important contributions, they are nonetheless  
100 limited in their phylogenetic robustness, as *C. reinhardtii* is the only unicellular relative within  
101 hundreds of millions of years available for comparison. Thus, the availability of annotated  
102 genomes for unicellular relatives of *C. reinhardtii* will also serve as an important resource  
103 towards reconstructing the ancestral core-*Reinhardtinia* gene content, potentially providing novel  
104 insights into the major evolutionary transitions that have occurred in this lineage.

105

106 Here we present highly contiguous and well-annotated genome assemblies for the two closest  
107 known relatives of *C. reinhardtii*, namely *Chlamydomonas incerta* and *Chlamydomonas*  
108 *schloesseri*, and a more distantly related unicellular species, *Edaphochlamys debaryana*. Via  
109 comparison to the genomes of *C. reinhardtii* and the TGV clade species we present the first  
110 insights into the comparative genomics of *Chlamydomonas*, focussing specifically on the  
111 conservation of genome architecture between species and the landscape of sequence  
112 conservation in *C. reinhardtii*. While forming only one of the initial steps in this process, by  
113 providing the first comparative genomics framework for the species we anticipate that these  
114 novel genomic resources will greatly aid in the continued development of *C. reinhardtii* as a  
115 model organism.

116

## 117 **Results & Discussion**

118

119 *The closest known relatives of Chlamydomonas reinhardtii*

120

121 Although the genus *Chlamydomonas* consists of several hundred unicellular species it is highly  
122 polyphyletic (Pröschold et al. 2001), and *C. reinhardtii* is more closely related to the  
123 multicellular TGV clade than the majority of *Chlamydomonas* species. Given their more

124 conspicuous morphology, the TGV clade contains ~50 described species (Herron et al. 2009),  
125 while the unicellular lineage leading to *C. reinhardtii* includes only two other confirmed species,  
126 *C. incerta* and *C. schloesseri* (Pröschold et al. 2005; Pröschold et al. 2018). As *C. reinhardtii* is  
127 the type species of *Chlamydomonas*, these three species collectively comprise the monophyletic  
128 genus (fig. 1a, b, c), and *Chlamydomonas* will be used specifically to refer to this clade  
129 throughout.

130  
131 *C. incerta* is the closest known relative of *C. reinhardtii*, and a small number of comparative  
132 genetics analyses have been performed between the two species (Ferris et al. 1997; Popescu et al.  
133 2006; Smith and Lee 2008). *C. incerta* is known from only two isolates, and we selected the  
134 original isolate SAG 7.73 for sequencing. Unfortunately, although *C. incerta* SAG 7.73 is  
135 nominally from Cuba, the geographic origin of the isolate is uncertain due to a proposed  
136 historical culture replacement with *C. globosa* SAG 81.72 from the Netherlands (Harris et al.  
137 1991). As the direction of replacement is unknown, the accepted taxonomic name of the species  
138 also remains undecided. *C. schloesseri* was recently described by Pröschold et al. (2018), and  
139 three isolates from a single site in Kenya exist in culture. We selected the isolate CCAP 11/173  
140 for sequencing.

141  
142 Beyond *Chlamydomonas* there are a substantial number of unicellular core-*Reinhardtinia* species  
143 with uncertain phylogenetic relationships (i.e. that may be part of the lineage including  
144 *Chlamydomonas*, the lineage including the TGV clade, or outgroups to both). Among these, the  
145 best studied species is *E. debaryana*, which was recently renamed from *Chlamydomonas*  
146 *debaryana* (Pröschold et al. 2018). Unlike the three described *Chlamydomonas* species, *E.*  
147 *debaryana* appears to be highly abundant in nature, with more than 20 isolates from across the  
148 Northern Hemisphere in culture, suggesting that it could be developed as a model for studying  
149 algal population structure and biogeography via the collection of further isolates. Draft genomes  
150 of the isolates NIES-2212 from Japan (Hirashima et al. 2016) and WS7 from the USA (Nelson et  
151 al. 2019) were recently assembled, while we selected the isolate CCAP 11/70 from Czechia for  
152 sequencing (fig. 1d).

153  
154

155 *The genomes of Chlamydomonas incerta, Chlamydomonas schloesseri & Edaphochlamys*  
156 *debaryana*

157

158 Using a combination of Pacific Biosciences (PacBio) long-read sequencing for *de novo* assembly  
159 (40-49x coverage, table S1) and Illumina short-read sequencing for error correction (43-86x  
160 coverage, table S2), we produced contig-level genome assemblies for *C. incerta*, *C. schloesseri*  
161 and *E. debaryana*. All three assemblies were highly contiguous, with N50s of 1.6 Mb (*C.*  
162 *incerta*), 1.2 Mb (*C. schloesseri*) and 0.73 Mb (*E. debaryana*), and L50s of 24, 30 and 56  
163 contigs, respectively (table 1). Genome-mode BUSCO scores supported a high-level of assembly  
164 completeness, with the percentage of universal chlorophyte single-copy orthologs identified in  
165 each genome ranging from 95.9% to 98.1%. These metrics compare favourably to the best  
166 existing core-*Reinhardtinia* assemblies (table 1). Although the *C. reinhardtii* and *V. carteri*  
167 assemblies have greater scaffold-level N50 values than the three new assemblies, they are both  
168 considerably more fragmented at the contig level, with N50s of 215 kb and 85 kb, respectively.  
169 While this is not surprising given our application of long-read sequencing, it nonetheless  
170 demonstrates that these important model genomes could be substantially improved by additional  
171 sequencing effort. The contig-level N50s of the three new assemblies also exceeded those of the  
172 *Gonium pectorale* assembly (Hanschen et al. 2016), and the Pacbio-based assemblies of  
173 *Yamagishiella unicocca* and *Eudorina sp. 2016-703-Eu-15* (hereafter *Eudorina sp.*) (Hamaji et  
174 al. 2018), and thus they currently represent the most contiguous assemblies in terms of  
175 uninterrupted sequence in the core-*Reinhardtinia*, and indeed the entire Volvocales (table S3).

176

177 Assembled genome size varied moderately across the eight species, ranging from 111.1 Mb (*C.*  
178 *reinhardtii*) to 184.0 Mb (*Eudorina sp.*) (table 1). Both *C. incerta* (129.2 Mb) and *C. schloesseri*  
179 (130.2 Mb) had consistently larger genomes than *C. reinhardtii*, and *E. debaryana* (142.1 Mb)  
180 had a larger genome than both *Y. unicocca* and *V. carteri*. Although additional genome  
181 assemblies will be required to fully explore genome size evolution in the core-*Reinhardtinia*,  
182 these results suggest that *C. reinhardtii* may have undergone a recent reduction in genome size.  
183 Furthermore, while earlier comparisons between multicellular species and *C. reinhardtii* led to  
184 the observation that certain metrics of genomic complexity (e.g. gene density and intron length,  
185 see below) correlate with organismal complexity, these results indicate that genome size, at least



186 for these species, does not. Conversely, as proposed by Hanschen et al. (2016), GC content does  
187 appear to decrease with increasing cell number, with genome-wide values ranging from 64.1 to  
188 67.1% for the unicellular species and from 64.5 to 56.1% in the TGV clade (table 1).

189  
190 The larger genome sizes of the unicellular species, relative to *C. reinhardtii*, can largely be  
191 attributed to differences in the content of transposable elements (TEs) and large satellite  
192 sequences (defined as those with monomers >10 bp), with all three species containing greater  
193 total amounts (20.1-27.5 Mb) and higher genomic proportions (14.1-21.1%) of complex  
194 repetitive sequence than *C. reinhardtii* (15.3 Mb and 13.8%) (table 1). As discussed below, the  
195 larger genome size of *E. debaryana* can also be partly attributed to the substantially higher  
196 number of genes encoded by the species. For all three assemblies, repeat content was relatively  
197 consistent across contigs, with the exception of small contigs (<~100 kb), which exhibited highly  
198 variable repeat contents and likely represent fragments of complex genomic regions that have  
199 resisted assembly (fig. S1). The higher repeat contents of the three assemblies were broadly  
200 consistent across TE subclasses (fig. S2), although a direct comparison of the TEs present in  
201 each genome is complicated by phylogenetic bias in repeat masking and classification. The  
202 existence of a curated repeat library for *C. reinhardtii* directly contributes to masking and can  
203 improve homology-based classification of repeats in related species, however this effect will  
204 become increasingly negligible as divergence increases. This is likely to at least partly explain  
205 the lower repeat content and higher proportion of “unknown” classifications observed for *E.*  
206 *debaryana* compared to *C. incerta* and *C. schloesseri* (table 1, fig. S2).

207  
208 Nonetheless, based on manual curation of the most abundant TE families in each species, a  
209 qualitative comparison is possible. All curated TEs belonged to subclasses and superfamilies that  
210 are present in one or both of *C. reinhardtii* and *V. carteri* (the two species with existing repeat  
211 libraries), suggesting a largely common repertoire of TEs across the core-*Reinhardtinia*.

212 Alongside the more widely recognised L1 LINE and Gypsy LTR elements, all species contained  
213 families of the comparatively obscure Dualen LINE elements (Kojima and Fujiwara 2005), PAT-  
214 like DIRS elements (Poulter and Butler 2015) and Helitron2 rolling-circle elements (Bao and  
215 Jurka 2013). We also identified families of Zisupton and Kyakuja DNA transposons, both of  
216 which were reported as potentially present in *C. reinhardtii* upon their recent discovery (Böhne



217 et al. 2012; Iyer et al. 2014). These superfamilies are greatly understudied, and there are  
218 currently no Kyakuja elements deposited in either the Repbase (<https://www.girinst.org/repbase/>)  
219 or Dfam (<https://www.dfam.org>) repositories. Although not the main focus of this study, the  
220 annotation of elements from such understudied superfamilies highlights the importance of  
221 performing manual TE curation in phylogenetically diverse lineages. Alongside improving our  
222 understanding of TE biology, these elements are expected to contribute towards more effective  
223 repeat masking/classification and gene model annotation in related species, which will be of  
224 increasing importance given the large number of chlorophyte genome projects currently in  
225 progress (Blaby-Haas and Merchant 2019).

226

### 227 *Phylogenomics of the core-Reinhardtinia and Volvocales*

228

229 Due to the low number of available genomes and gene annotations, the phylogenetics of the  
230 Volvocales has almost exclusively been studied using ribosomal and plastid marker genes. These  
231 analyses have successfully delineated several broad clades (e.g. *Reinhardtinia*, *Moewusinia*,  
232 *Dunaliellinia*) (Nakada et al. 2008), but often yielded inconsistent topologies for more closely  
233 related taxa. Utilising both our own and several recently published genomic resources, we further  
234 explored the phylogenomic structure of the *Reinhardtinia* and Volvocales. As several genomes  
235 currently lack gene annotations, we first used an annotation-free approach based on the  
236 identification of chlorophyte single-copy orthologous genes with BUSCO (Waterhouse et al.  
237 2018). This dataset consisted of 1,624 genes, present in at least 15 of the 18 included species (12  
238 *Reinhardtinia*, three other Volvocales, and three outgroups from the order Sphaeropleales, table  
239 S3). For the 11 species with gene annotations (table S4), we produced a second dataset based on  
240 the orthology clustering of each species' proteome, which yielded 1,681 single-copy orthologs  
241 shared by all species. For both datasets, we performed maximum-likelihood (ML) analyses using  
242 IQ-TREE (Nguyen et al. 2015). Analyses were performed on both concatenated protein  
243 alignments (producing a species-tree) and individual alignments of each ortholog (producing  
244 gene trees), which were then summarised as a species-tree using ASTRAL-III (Zhang et al.  
245 2018).

246

247 All four of the resulting phylogenies exhibited entirely congruent topologies, with near maximal-  
248 support values at all nodes (fig. 2, S3). Rooting the tree on the Sphaeropleales species, the  
249 monophyly of the Volvocales, *Reinhardtinia*, and core-*Reinhardtinia* clades were recovered.  
250 *Chlamydomonas* was recovered with the expected branching order (Pröschold et al. 2018), as  
251 was the monophyly and expected topology of the TGV clade (Nakada et al. 2019). The most  
252 contentious phylogenetic relationships are those of the remaining unicellular core-*Reinhardtinia*,  
253 which include *E. debaryana* and also the recently published genomes of *Chlamydomonas*  
254 *sphaeroides* (Hirashima et al. 2016) and *Chlamydomonas sp. 3112* (Nelson et al. 2019). In the  
255 most gene-rich analysis to date, *E. debaryana* was grouped in a weakly-supported clade with  
256 *Chlamydomonas* (termed metaclade C), while *C. sphaeroides* grouped with a small number of  
257 other unicellular species on the lineage including the TGV clade (Nakada et al. 2019). In our  
258 analysis, *E. debaryana* and *C. sphaeroides* were recovered as sister taxa on the lineage including  
259 *Chlamydomonas*, meeting the prior definition of metaclade C as the sister clade of the TGV  
260 clade and its unicellular relatives. Due to its recent discovery, *C. sp. 3112* has not been included  
261 in previous phylogenetic analyses. This species is a member of the core-*Reinhardtinia* based on  
262 sequence similarity of ribosomal and plastid genes, and is likely a close relative of the described  
263 species *Chlamydomonas zebra* (table S5). Given its basal phylogenetic position relative to  
264 metaclade C and the TGV clade, species such as *C. sp. 3112* could prove particularly useful in  
265 future efforts to reconstruct the ancestral gene content of the core-*Reinhardtinia*.

266

#### 267 *Synteny and conserved genome architecture in Chlamydomonas*

268

269 Almost nothing is known about karyotype evolution and the rate of chromosomal rearrangements  
270 in *Chlamydomonas* and the core-*Reinhardtinia*. Prochnik et al. (2010) reported that the syntenic  
271 genomic segments identified between *C. reinhardtii* and *V. carteri* contained fewer genes than  
272 human and chicken syntenic segments, in part due to a greater number of small inversions  
273 disrupting synteny. As the longest contigs in our assemblies were equivalent in length to *C.*  
274 *reinhardtii* chromosome arms (6.4, 4.5 and 4.2 Mb for *C. incerta*, *C. schloesseri* and *E.*  
275 *debaryana*, respectively), and given the closer evolutionary relationships of the unicellular  
276 species, we explored patterns of synteny between the three species and *C. reinhardtii*. We used  
277 SynChro (Drillon et al. 2014) to identify syntenic segments, which first uses protein sequence

278 reciprocal best-hits to anchor syntenic segments, before extending segments via the inclusion of  
279 homologs that are syntenic but not reciprocal best-hits. All three *Chlamydomonas* genomes were  
280 highly syntenous, with 99.5 Mb (89.5%) of the *C. reinhardtii* genome linked to 315 syntenic  
281 segments spanning 108.1 Mb (83.6%) of the *C. incerta* genome, and 98.5 Mb (88.6%) of the *C.*  
282 *reinhardtii* genome linked to 409 syntenic segments spanning 108.1 Mb (83.1%) of the *C.*  
283 *schloesseri* genome.

284  
285 Given the high degree of synteny, it was possible to order and orientate the contigs of *C. incerta*  
286 and *C. schloesseri* relative to the assembled chromosomes of *C. reinhardtii* (fig. 3). A substantial  
287 proportion of the *C. reinhardtii* karyotype appeared to be conserved in *C. incerta*, with six of the  
288 17 chromosomes (1, 3, 4, 7, 14 and 16) showing no evidence of inter-chromosomal  
289 rearrangements, and a further three (5, 13 and 15) showing evidence for only minor  
290 translocations <150 kb in length (fig. 3a). Consistent with its greater divergence from *C.*  
291 *reinhardtii*, *C. schloesseri* exhibited such one-to-one conservation between only four  
292 chromosomes (5, 7, 11 and 14) (fig. 3b). For both species, patterns of synteny indicated at least  
293 one inter-chromosomal rearrangement affecting the remaining chromosomes, although without  
294 additional scaffolding of contigs it is difficult to comment on the overall effect of such  
295 rearrangements on karyotype. Furthermore, by direct comparison to *C. reinhardtii* chromosomes,  
296 we may have overestimated karyotype conservation due to undetected chromosome  
297 fusion/fission events (i.e. if a *C. reinhardtii* chromosome is present as two chromosomes in one  
298 of the related species). Across both *C. incerta* and *C. schloesseri*, all chromosomes (except  
299 chromosome 15 in the *C. incerta* comparison) contained intra-chromosomal rearrangements  
300 relative to *C. reinhardtii*, with small inversions <100 kb in length comprising the vast majority  
301 (fig. S4a, b). Synteny was far weaker between *C. reinhardtii* and *E. debaryana*, with 58.6 Mb  
302 (52.8%) of the *C. reinhardtii* genome linked to 1,975 syntenic segments spanning 64.8 Mb  
303 (45.6%) of the *E. debaryana* genome (fig. S4c). Taken together with the previous assessment of  
304 synteny between *C. reinhardtii* and *V. carteri*, these results suggest that karyotype evolution in  
305 the core-*Reinhardtinia* is expected to be dynamic, with very high levels of synteny but a non-  
306 negligible rate of inter-chromosomal rearrangements present between closely related species, and  
307 likely far greater karyotypic diversity present between more distantly related species.  
308

309 Given the high-contiguity and synteny of the assemblies, it was possible to assess several  
310 complex features of genome architecture that regularly resist assembly in short-read assemblies.  
311 Telomeric repeats were observed in all three assemblies, with six *C. incerta* and 19 *C.*  
312 *schloesseri* contigs terminating in the satellite (TTTTAGGG)<sub>n</sub>, and 15 *E. debaryana* contigs  
313 terminating in (TTTAGGG)<sub>n</sub> (table S6). The *Arabidopsis*-type sequence (TTTAGGG)<sub>n</sub> is  
314 ancestral to green algae and was previously confirmed as the telomeric repeat present in *E.*  
315 *debaryana*, while the derived *Chlamydomonas*-type sequence (TTTTAGGG)<sub>n</sub> is found in both *C.*  
316 *reinhardtii* and *V. carteri* (Fulnečková et al. 2012). Given the phylogenetic relationships  
317 presented above (fig. 2), this implies either two independent transitions to the derived sequence  
318 or a reversion to the ancestral sequence in the lineage including *E. debaryana*, providing further  
319 evidence for the relatively frequent transitions that have produced extensive variation in telomere  
320 composition in green algae and land plants (Peska and Garcia 2020).

321  
322 Ribosomal DNA repeats (rDNA) were assembled as part of three larger contigs in both *C.*  
323 *incerta* and *C. schloesseri*, but were found only as fragmented contigs entirely consisting of  
324 rDNA in *E. debaryana*. Although poorly assembled in *C. reinhardtii*, the rDNA arrays are  
325 located at subtelomeric locations on chromosomes 1, 8 and 14, where cumulatively they are  
326 estimated to be present in 250-400 tandem copies (Howell 1972; Marco and Rochaix 1980). The  
327 assembled *C. incerta* and *C. schloesseri* rDNA arrays (which are also not complete and are  
328 tandemly repeated at most five times) were entirely syntenous with those of *C. reinhardtii*,  
329 suggesting conservation of subtelomeric rDNA organisation in *Chlamydomonas* (fig. 3). rDNA  
330 arrays are commonly located in subtelomeric regions across several taxa, where among several  
331 other factors their location may be important for genomic stability (Dvořáčková et al. 2015).

332  
333 Finally, we were able to assess the composition and potential synteny of centromeres in  
334 *Chlamydomonas*. The centromeric locations of 15 of the 17 *C. reinhardtii* chromosomes were  
335 recently mapped by Lin et al. (2018), who observed that these regions were characterised by  
336 multiple copies of genes encoding reverse-transcriptase. Upon inspection of these regions, we  
337 found that these genes are generally encoded by copies of the L1 LINE element L1-1\_CR.  
338 Although these regions are currently not well-enough assembled to conclusively define the  
339 structure of centromeric repeats, L1-1\_CR is present in multiple copies at all 15 putative

340 centromeres and appears to be the major centromeric component (with chromosome-specific  
341 contributions from other TEs, especially Dualen LINE elements) (table S7, fig S5a).  
342 Remarkably, phylogenetic analysis of all curated L1 elements from green algae indicated that  
343 L1-1\_CR is more closely related to the Zepp elements of *Coccomyxa subellipsoidea* than to any  
344 other L1 elements annotated in *C. reinhardtii* (fig. 4a). The divergence of the classes  
345 Trebouxiophyceae (to which *C. subellipsoidea* belongs) and Chlorophyceae (to which *C.*  
346 *reinhardtii* belongs) occurred in the early Neoproterozoic era (i.e. 700-1,000 million years ago)  
347 (Del Cortona et al. 2020), suggesting that L1-1\_CR has been evolving independently from all  
348 other *C. reinhardtii* L1 elements for more than half a billion years. Zepp elements are of  
349 particular interest as they are thought to constitute the centromeres in *C. subellipsoidea*, where  
350 they are strictly present as one cluster per chromosome (Blanc et al. 2012). The clustering pattern  
351 of Zepp elements arises due to a nested insertion mechanism that targets existing copies, creating  
352 tandem arrays consisting mostly of the 3' end of the elements (due to frequent 5' truncations  
353 upon insertion) (Higashiyama et al. 1997). Chromosome-specific clustering of L1-1\_CR was  
354 also evident in *C. reinhardtii*, with highly localised clusters observed at all 15 of the putative  
355 centromeres (fig. 4b). The double-peaks in L1-1\_CR density present on chromosomes 2, 3 and 8,  
356 and the single sub-telomeric cluster present on chromosome 5, are all the result of the incorrect  
357 scaffolding of contigs in these highly repetitive regions (unpublished data). Thus, outside the  
358 putative centromeres, L1-1\_CR appears to be entirely absent from the *C. reinhardtii* genome.  
359  
360 Every centromeric location in *C. reinhardtii* coincided with breaks in syntenic segments and the  
361 termination of contigs in *C. incerta* and *C. schloesseri* (fig. 3), suggesting that these regions are  
362 also likely to be repetitive in both species. The phylogenetic analysis revealed the presence of  
363 one and two L1-1\_CR homologs in *C. incerta* and *C. schloesseri*, respectively, which we term  
364 Zepp-like (ZeppL) elements (fig. 4a). Of the 30 contig ends associated with the 15 *C. reinhardtii*  
365 centromeres, 28 contigs in both species contained a ZeppL element within their final 20 kb (fig.  
366 S5b, c), and genome-wide the ZeppL elements exhibited similarly localised clustering to that  
367 observed in *C. reinhardtii* (fig. S6a, b). Thus, it appears that both the location and composition of  
368 the *C. reinhardtii* centromeres are likely to be conserved in both *C. incerta* and *C. schloesseri*.  
369 We further identified two families of ZeppL elements in the *E. debaryana* genome and one  
370 family of ZeppL elements in the *Eudorina sp.* genome, although we did not find any evidence for

371 ZeppL elements in either *Y. unicocca* or *V. carteri*. Given the lack of synteny between *C.*  
372 *reinhardtii* and *E. debaryana* it was not possible to assign putatively centromeric contigs.  
373 Nonetheless, highly localised genomic clustering of ZeppL elements was observed for both *E.*  
374 *debaryana* and *Eudorina sp.* (fig. S6c, d), suggesting that these elements may play a similar role  
375 to that in *Chlamydomonas*.

376

377 As sequencing technologies advance it is becoming increasingly clear that TEs, alongside  
378 satellite DNA, contribute substantially to centromeric sequence in many species (Chang et al.  
379 2019; Fang et al. 2020). Given the evolutionary distance between *C. subellipsoidea* and  
380 *Chlamydomonas*, it is tempting to predict that ZeppL elements may be present at the centromeres  
381 of many other species of green algae. However, it is unlikely that centromeres are conserved  
382 between species from the Trebouxiophyceae and Chlorophyceae. Firstly, it has recently been  
383 shown that the centromeric repeats in the Chlorophyceae species *Chromochloris zofingiensis*  
384 consist of LTR elements from the Copia superfamily (Roth et al. 2017). Secondly, the apparent  
385 absence of ZeppL elements from *Y. unicocca* and *V. carteri* suggest that these elements are not  
386 required for centromere formation in these species. Instead, it is possible that the propensity for  
387 Zepp and ZeppL elements to form clusters may play a role in their recruitment as centromeric  
388 sequences, which is likely to have happened independently in *C. subellipsoidea* and  
389 *Chlamydomonas*. As more highly contiguous chlorophyte assemblies become available, it will be  
390 important to search these genomes for ZeppL clusters to assess whether these elements can be  
391 used more generally as centromeric markers.

392

### 393 *Gene and gene family evolution in the core-Reinhardtinia*

394

395 Gene model annotation was performed for each species using 7.4-8.2 Gb of stranded RNA-seq  
396 (table S8). Protein mode BUSCO scores supported a high level of annotation completeness  
397 across all three species (97.0-98.1% chlorophyte genes present), although relative to genome  
398 mode scores there was an increase in the proportion of genes identified as fragmented (4.0-5.9%)  
399 (table 2). *C. incerta* and *C. schloesseri* had comparable gene counts to *C. reinhardtii*, although  
400 lower gene densities as a result of their larger genomes. With 19,228 genes, the *E. debaryana*  
401 genome contained substantially more genes than any other currently annotated core-



402 *Reinhardtinia* species. As reported by Hanschen et al. (2016), several metrics appeared to  
403 correlate with organismal complexity. Relative to the unicellular species, gene density was  
404 lower, and median intergenic and intronic lengths were longer, in *G. pectorale* and *V. carteri*.  
405 Presumably this is at least partly due to an increase in the amount of regulatory sequence in these  
406 genomes, although this has not yet been explored.

407  
408 Across all species, both mean intron lengths (discussed below) and intron numbers per gene were  
409 very high for such compact genomes. For the unicellular species, the mean number of introns per  
410 gene coding sequence ranged from 7.7-9.3, with slightly lower counts in *G. pectorale* (6.2) and  
411 *V. carteri* (6.7). These numbers are more comparable to vertebrates such as human (8.5) than to  
412 other model organisms with similar genomes sizes, such as *Caenorhabditis elegans* (5.1),  
413 *Drosophila melanogaster* (3.0), and *Arabidopsis thaliana* (4.1). Modelling of intron evolution  
414 across the breadth of eukaryota has predicted that a major expansion of introns occurred early in  
415 chlorophyte evolution (prior to the divergence of Chlorophyceae and Trebouxiophyceae), and  
416 that high intron densities have since been maintained in certain lineages by a balance between  
417 intron loss and gain (Csuros et al. 2011). It has been hypothesised that the relative roles of DNA  
418 double-strand break repair pathways play a major role in the dynamics of intron gain and loss, as  
419 the homologous recombination (HR) pathway is thought to cause intron deletion, while non-  
420 homologous end-joining (NHEJ) may result in both intron gain and loss (Farlow et al. 2011). In  
421 is interesting to note that HR occurs at an extremely low rate in *C. reinhardtii* (Plecenikova et al.  
422 2014), and if this is shared across *Chlamydomonas* and the core-*Reinhardtinia*, it may contribute  
423 to the maintenance of such high intron numbers. Alternatively, introns could be maintained by  
424 other forces, such as selection. Intron gains and losses caused by NHEJ are expected to possess  
425 specific genomic signatures (Farlow et al. 2011; Sun et al. 2015), and thus it should now be  
426 possible to test this hypothesis by exploring patterns of intron gain and loss across the three  
427 *Chlamydomonas* species.

428  
429 To explore gene family evolution in the core-*Reinhardtinia*, we performed orthology clustering  
430 using the six available high-quality gene annotations (98,342 total protein-coding genes), which  
431 resulted in the delineation of 13,728 orthogroups containing 86,446 genes (fig. 5). The majority  
432 of orthogroups (8,532) were shared by all species, with the second most abundant category



433 (excluding genes unique to a single species) being those present in all species except *G.*  
434 *pectorale* (868 orthogroups). Given the lower BUSCO score observed for *G. pectorale* (table 2)  
435 it is likely that a proportion of these orthogroups are also universal to core-*Reinhardtinia* species.  
436 The next most abundant category was the 859 orthogroups present only in *Chlamydomonas*.  
437 Unfortunately, essentially nothing is known about the biology and ecology of *C. incerta* and *C.*  
438 *schloesseri*, and even for *C. reinhardtii* we have a minimal understanding of its biology in  
439 natural environments (Sasso et al. 2018; Craig et al. 2019). Although many of the  
440 *Chlamydomonas*-specific orthogroups are associated with functional domains, this scenario  
441 currently precludes the formation of any clear hypotheses to test. In contrast to *Chlamydomonas*,  
442 only 51 orthogroups were unique to the two multicellular species. This may be an underestimate  
443 due to the relative incompleteness of the *G. pectorale* annotation, and it will be important to re-  
444 visit this analysis as more annotations become available (e.g. for *Y. unicocca* and *Eudorina sp.*).  
445 Nonetheless, the availability of our three new high-quality annotations for unicellular species  
446 will provide a strong comparative framework to explore the relative roles of gene family birth  
447 versus expansions in existing gene families in the transition to multicellularity.  
448  
449 Finally, we explored the contribution of gene family expansions to the high gene number  
450 observed in *E. debaryana*. The *E. debaryana* genome contained more species-specific genes  
451 (3,556) than any other species, however this figure was not substantially higher than the  
452 unassigned gene counts for *G. pectorale* and *V. carteri* (fig. 5). We quantified *E. debaryana* gene  
453 family expansion and contraction by calculating per orthogroup log<sub>2</sub>-transformed ratios of the *E.*  
454 *debaryana* gene count and the mean gene count for the other species. Arbitrarily defining an  
455 expansion as a log<sub>2</sub>-transformed ratio >1 (i.e. a given orthogroup containing more than twice as  
456 many *E. debaryana* genes than the mean of the other species) and a contraction as a ratio <-1, we  
457 identified *E. debaryana*-specific expansions in 294 orthogroups and contractions in 112.  
458 Although 192 of the expanded orthogroups were associated with functional domains (table S9), it  
459 is once again very difficult to interpret these results without any knowledge of the biological  
460 differences between unicellular species. Given that *E. debaryana* has been found across the  
461 Northern Hemisphere it is possible that the species experiences a greater range of environments  
462 than the *Chlamydomonas* species, however this is currently entirely speculative.  
463

464 *Evolution of the mating-type locus in Chlamydomonas*

465

466 Across core-*Reinhardtinia* species, sex is determined by a haploid mating-type locus (MT) with  
467 two alleles, termed MT+ or female, and MT- or male, in isogamous and anisogamous species,  
468 respectively. The *C. reinhardtii* MT is located on chromosome 6, spanning >400 kb and  
469 consisting of three domains, the T (telomere-proximal), R (rearranged) and C (centromere-  
470 proximal) domains. While both the T and C domains exhibit high synteny between the MT  
471 alleles, the R domain contains the only MT limited genes (Ferris and Goodenough 1997) and  
472 harbours substantial structural variation, featuring several inversions and rearrangements (Ferris  
473 et al. 2002; De Hoff et al. 2013). Crossover events are suppressed across the entire MT, although  
474 genetic differentiation between gametologs is reduced as a result of widespread gene conversion  
475 (De Hoff et al. 2013; Hasan et al. 2019). Comparative analyses of MT+/female and MT-/male  
476 haplotypes between core-*Reinhardtinia* species, and particularly between TGV clade species,  
477 have revealed highly dynamic MT evolution, with extensive gene turnover and structural  
478 variation resulting in a complex and discontinuous evolutionary history of haplotype reformation  
479 (Ferris et al. 2010; Hamaji et al. 2016b; Hamaji et al. 2018). This is most strikingly illustrated by  
480 the MT male R domains of *V. carteri* and *Eudorina* sp., the former being ~1.1 Mb in length and  
481 relatively repeat-rich, while the latter is just 7 kb and contains only three genes (Hamaji et al.  
482 2018). Only one MT limited gene is common to all species, the minus dominance gene *MID*,  
483 which determines MT-/male gametic differentiation (Ferris and Goodenough 1997; Yamamoto et  
484 al. 2017).

485

486 To explore whether MT evolution is similarly dynamic between the more closely related  
487 *Chlamydomonas* species, we used a reciprocal best-hit approach to identify *C. reinhardtii* MT  
488 orthologs in *C. incerta* and *C. schloesseri*. The sequenced isolates of both species were  
489 determined to be MT- based on the presence of *MID*, as was previously reported for *C. incerta*  
490 (Ferris et al. 1997). Although we were able to map the entire *C. reinhardtii* MT- haplotype to  
491 single contigs in both the *C. incerta* and *C. schloesseri* assemblies, it is important to state that it  
492 is currently impossible to define the R domain boundaries for either species without sequencing  
493 their MT+ alleles. Unfortunately, it is currently unknown if any of the one (*C. incerta*) or two (*C.*  
494 *schloesseri*) other isolates are MT+, and as no isolate from either species has been successfully

495 crossed it is not even known if they are sexually viable (Pröschold et al. 2005). We also  
496 determined the sequenced isolate of *E. debaryana* to be MT- via the identification of *MID*,  
497 although we did not explore MT evolution further given the evolutionary distance to *C.*  
498 *reinhardtii*. At least one heterothallic mating pair of *E. debaryana* are in culture, and a future  
499 comprehensive study of MT in the species is therefore possible.

500

501 In *C. incerta*, gene order was entirely syntenic across the C domain, with the exception of  
502 *MT0828*, which did not yield a hit anywhere in the genome. Conversely, both T and R domain  
503 genes have undergone several rearrangements and inversions relative to *C. reinhardtii* MT- (fig.  
504 6a). Furthermore, the T domain genes *SPP3* and *HDH1* were present on separate contigs in *C.*  
505 *incerta* and do not appear to be MT-linked (table S10). Synteny otherwise continued well into  
506 the adjacent autosomal sequence, in line with the genome-wide patterns of synteny described  
507 above. We observed even less synteny between *C. reinhardtii* and *C. schloesseri* MT- genes,  
508 with both the T and C domains showing two large inversions each (fig. 6b). However, gene order  
509 in the surrounding autosomal sequence was also largely collinear. As in *C. incerta*, *SPP3* was  
510 located elsewhere in the *C. schloesseri* assembly, suggesting a relatively recent translocation to  
511 the T domain in *C. reinhardtii*. Finally, the C domain gene *97782* was also located on a different  
512 contig, while the genes *MT0796*, *MT0828* and *182389* did not yield hits anywhere in the *C.*  
513 *schloesseri* genome. While the *C. reinhardtii* MT- limited gene *MTD1* was found in both *C.*  
514 *incerta* and *C. schloesseri*, we found no hits for the MT+ limited genes *FUS1* and *MTA1*,  
515 suggesting that these genes (assuming they exist) are also expected to be MT+ limited in both  
516 species.

517

518 The lack of collinearity relative to the *C. reinhardtii* T domain may be indicative of an extended  
519 R domain in these species, especially in *C. schloesseri*, where we observe multiple  
520 rearrangements in all three domains. We do not, however, observe dramatic variation in MT size;  
521 whereas *C. reinhardtii* MT- is ~422 kb, if *NIC7* and *MAT3* are taken as the boundaries of the  
522 locus (De Hoff et al. 2013), *C. incerta* MT- is ~329 kb and *C. schloesseri* MT- is ~438 kb. In all,  
523 while we do find evidence of MT- haplotype reformation within *Chlamydomonas*, this is mostly  
524 limited to rearrangements, with far less gene turnover and MT size variation than has been  
525 observed between more distantly related core-*Reinhardtinia* species. While MT evolution has

526 previously been explored in the context of transitions from unicellularity to multicellularity and  
527 isogamy to anisogamy, our data suggest that MT haplotype reformation is still expected to occur  
528 between closely related isogamous species, albeit at a reduced scale.

529

### 530 *Alignability and estimates of neutral divergence*

531

532 In order to facilitate the identification of conserved elements (CEs), we produced an 8-species  
533 core-*Reinhardtia* whole-genome alignment (WGA) using Cactus (Armstrong et al. 2019).  
534 Based on the alignment of *C. reinhardtii* four-fold degenerate (4D) sites extracted from the  
535 WGA, we estimated putatively neutral branch lengths across the topology connecting the eight  
536 species using the GTR substitution model (fig. 7a). Divergence between *C. reinhardtii* and *C.*  
537 *incerta*, and *C. reinhardtii* and *C. schloesseri*, was estimated as 34% and 45%, respectively.  
538 Divergence between *C. reinhardtii* and *E. debaryana* was estimated as 98%, while all four TGV  
539 clade species were saturated relative to *C. reinhardtii* (i.e. on average, each 4D site is expected to  
540 have experienced more than one substitution). To put these estimates within a more recognisable  
541 framework, divergence across *Chlamydomonas* is approximately on the scale of human-rodent  
542 divergence (Lindblad-Toh et al. 2011), while divergence between *Chlamydomonas* and the TGV  
543 clade is approximately equivalent to that of mammals and sauropsids (birds and reptiles), which  
544 diverged ~320 million years ago (Alföldi et al. 2011). Our estimates corroborate a previous  
545 estimate of synonymous divergence between *C. reinhardtii* and *C. incerta* of 37% (averaged  
546 over 67 orthologous genes) (Popescu et al. 2006), and are broadly in line with the divergence  
547 time estimate of ~230 million years ago between the TGV clade and their unicellular ancestors  
548 (Herron et al. 2009). Finally, it is important to note that we have likely underestimated neutral  
549 divergence, as 4D sites are unlikely to be evolving neutrally due to selection acting on codon  
550 usage, which has been shown to decrease divergence between *C. reinhardtii* and *C. incerta*  
551 (Popescu et al. 2006).

552

553 As expected, genome-wide alignability (i.e. the proportion of bases aligned between *C.*  
554 *reinhardtii* and a given species in the WGA) decreased substantially with increasing divergence,  
555 with 53.0% of the *C. reinhardtii* genome aligned to *C. incerta*, 48.6% to *C. schloesseri*, and on  
556 average only 19.9% to the remaining five species (fig. 7b). The majority of *C. reinhardtii* CDS

557 was alignable within *Chlamydomonas* (87.7% and 85.5% to *C. incerta* and *C. schloesseri*,  
558 respectively), indicating that it will be possible to perform molecular evolutionary analyses on  
559 CDS between the three species. CDS also constituted the majority of the aligned sequence to the  
560 other five species, comprising on average 78.3% of the aligned bases despite CDS forming only  
561 35.2% of the *C. reinhardtii* genome. In contrast, far less non-exonic sequence was alignable,  
562 especially at evolutionary distances beyond *Chlamydomonas*. Substantial proportions of intronic  
563 bases were aligned to *C. incerta* (44.1%) and *C. schloesseri* (38.8%), with on average 11.3%  
564 aligned to the other five species. Less than 10% of intergenic sequence was aligned to any one  
565 species, and on average less than 1% was aligned to non-*Chlamydomonas* species. Distributions  
566 of intergenic tract lengths across the core-*Reinhardtinia* are highly skewed (fig. S7), so that in *C.*  
567 *reinhardtii* tracts shorter than 250 bp constitute 63.5% of tracts but just 5.5% of total intergenic  
568 sequence. The sequence content of tracts >250 bp is highly repetitive (total repeat content  
569 63.4%), while tracts <250 bp are relatively free of repeats (4.3% repeat content) and as a result  
570 are far more alignable to *C. incerta* and *C. schloesseri* (40.8% and 32.0% of bases aligned,  
571 respectively). This suggests that at least for introns and short intergenic tracts it is feasible to  
572 explore the landscape of non-exonic evolutionary constraint, primarily utilising alignment data  
573 from *Chlamydomonas*, supplemented by what is likely the alignment of only the most conserved  
574 sites at greater evolutionary distances.

575

#### 576 *Missing genes in Chlamydomonas reinhardtii*

577

578 One of the major successes of comparative genomics has been the refinement of gene  
579 annotations and identification of novel gene models and exons (e.g. Lin et al. (2008); Mudge et  
580 al. (2019)). Prior to identifying conserved sequences and classifying them as coding or  
581 noncoding, we attempted to identify novel *C. reinhardtii* genes absent from the latest annotation  
582 (v5.6) using patterns of *Chlamydomonas* synteny and the core-*Reinhardtinia* WGA. A *de novo*  
583 *C. reinhardtii* gene annotation yielded 433 novel gene models, 142 of which were retained based  
584 on the presence of a syntenic homolog in one or both of the *Chlamydomonas* species, and/or a  
585 phyloCSF (Lin et al. 2011) score >100. PhyloCSF assesses the protein-coding potential of a  
586 multi-species alignment using patterns of substitution at putative synonymous and non-  
587 synonymous sites, and so is not reliant on gene annotations in other species. Of the 142

588 supported genes, 90 had significant BLASTp hits (e-value  $<1 \times 10^{-5}$ ,  $\geq 80\%$  protein length) to *C.*  
589 *reinhardtii* proteins from annotation version 4.3 and likely represent models that were lost during  
590 the transition from v4 to v5 of the genome.

591

592 *The genomic landscape of sequence conservation in Chlamydomonas reinhardtii*

593

594 Based on the core-*Reinhardtinia* WGA, we identified 265,006 CEs spanning 33.8 Mb or 31.5%  
595 of the *C. reinhardtii* genome. The majority of CE bases overlapped CDS (70.6%), with the  
596 remaining bases overlapping 5' UTRs (2.9%), 3' UTRs (4.4%), introns (20.0%) and intergenic  
597 sites (2.0%) (table 3). Relative to the site class categories themselves, 63.1% of CDS bases,  
598 24.8% of 5' UTR bases, 11.0% of 3' UTR bases, and 19.2% of intronic bases were overlapped  
599 by CEs. Only 4.1% of intergenic bases were covered by CEs, however when splitting intergenic  
600 tracts into those  $<250$  bp (short tracts) and  $>250$  bp (long tracts), a more appreciable proportion  
601 of short tract bases (14.1%) were covered by CEs. As would be predicted given the expectation  
602 that CEs contain functional sequences, *C. reinhardtii* genetic diversity ( $\pi$ ) was 39.5% lower for  
603 CEs (0.0134) than non-CE bases (0.0220), a result that was relatively consistent across site  
604 classes with the exception of long intergenic tracts (table 3). It is, however, important to state  
605 that the CEs we have identified are likely to contain a proportion of non-constrained sites. While  
606 this is always to be expected to some extent (e.g. CDS is generally included in CEs despite the  
607 presence of synonymous sites), given a mean length of 128 bp our CE dataset should be  
608 cautiously interpreted as regions containing elevated proportions of constrained sites.

609

610 Given the compactness of the *C. reinhardtii* genome (82.1% genic, median intergenic tract  
611 length 134 bp), it is expected that a high proportion of regulatory sequence will be concentrated  
612 in UTRs and intergenic sequences immediately upstream of genes (i.e. promoter regions).  
613 Relatively little is known about the genome-wide distribution of regulatory elements in *C.*  
614 *reinhardtii*, although analyses based on motif modelling have identified putative *cis*-regulatory  
615 elements enriched in these regions (Ding et al. 2012; Hamaji et al. 2016a). Presumably many  
616 CEs overlapping UTRs and promoter regions harbour regulatory elements, and the CEs we have  
617 identified could be used in future studies to validate potential functional motifs. Due to our  
618 inability to align longer intergenic tracts, it remains an open question whether functional



619 elements are present at non-negligible abundances in these regions. Although the lack of  
620 alignment could in itself be taken for a lack of constraint, the highly repetitive nature of these  
621 regions may disrupt the alignment of functional sequences present among repeats. It is noticeable  
622 that *C. reinhardtii* genetic diversity is lower in long intergenic tracts than all site classes except  
623 CDS (table 3), which could be due the presence of functional sequences or alternatively an as of  
624 yet unknown evolutionary mechanism.

625

626 All six annotated core-*Reinhardtinia* species contained conspicuously long introns (median  
627 lengths 198-343 bp, table 2). As reported previously for *C. reinhardtii* (Merchant et al. 2007), the  
628 distribution of intron lengths for core-*Reinhardtinia* species lacked the typical peak in intron  
629 lengths at 60-110 bp that is present in several model organisms with similarly compact genomes  
630 (fig. 8a, b). In *D. melanogaster*, short introns (<80 bp) appear to largely consist of neutrally  
631 evolving sequence, while longer introns that form the tail of the length distribution contain  
632 sequences evolving under evolutionary constraint (Halligan and Keightley 2006). To explore the  
633 relationship between intron length and sequence conservation in *C. reinhardtii*, we ordered  
634 introns by length and divided them into 50 bins, so that each bin contained an approximately  
635 equal number (~2,667) of introns. Mean intron length per bin was significantly negatively  
636 correlated with the proportion of bases overlapped by CEs (Pearson's  $r = -0.626$ ,  $p < 0.01$ ) (fig.  
637 8c). This was particularly pronounced for introns <100 bp (~5% of introns), for which 48.1% of  
638 bases were overlapped by CEs, compared to 18.5% for longer introns. Therefore, it appears that  
639 in a reverse of the situation found in *D. melanogaster*, the minority of introns in *C. reinhardtii*  
640 are short and potentially functionally important, while the majority of introns are longer and  
641 contain far fewer conserved bases. The tight peak in the distribution of intron lengths combined  
642 with the lack of sequence constraint in *D. melanogaster* short introns led Halligan and Keightley  
643 (2006) to hypothesise that intron length was under selection, but not the intronic sequence itself,  
644 and that introns had essentially evolved to be as short as possible. It is possible that *C.*  
645 *reinhardtii* introns >100 bp are similarly evolving under selection to be bounded within certain  
646 length constraints, although the selective advantage of maintaining intron lengths substantially  
647 longer than the minimum remains unknown. Given that atypical intron length distributions are  
648 common to all core-*Reinhardtinia* species, whatever mechanism is driving intron length is likely  
649 to be evolutionarily ancient.



650 There are at least two leading explanations for why shorter *C. reinhardtii* introns may be  
651 functionally important. Firstly, intron retention (IR) has been shown to occur significantly more  
652 frequently in shorter genes (median = 181 bp) (Raj-Kumar et al. 2017). IR is the most common  
653 form of alternative splicing (AS) detected in *C. reinhardtii* (~30% of AS events), although AS in  
654 the species has not yet been extensively characterised and only ~1% of introns are currently  
655 annotated as alternatively retained. Furthermore, as only ~20% of IR events produce a functional  
656 protein (Raj-Kumar et al. 2017), not all retained introns are expected to be evolving under coding  
657 constraint. It is therefore difficult to assess the overall contribution of IR to intronic sequence  
658 conservation. Secondly, short introns may be enriched for regulatory sequences. Short introns  
659 <100 bp represent the first intron in a gene approximately four-fold more frequently (44.6%)  
660 than longer introns (10.3%) (fig. S8a). Introns <100 bp were also significantly more likely to  
661 occur closer to the transcription start site (mean intron positions relative to transcript length for  
662 introns <100 bp = 24.2% and introns >100 bp = 39.5%; independent-samples t-test  $t=-54.0$ ,  
663  $p<0.01$ ) (fig. S8b). For many genes, introns within the first 1 kb have strong regulatory effects on  
664 gene expression (Rose 2018), and in *C. reinhardtii* it has been shown that the addition of a  
665 specific first intron to transgenes substantially increases their expression (Baier et al. 2018). It is  
666 also important to emphasise that a non-negligible proportion of sites in introns >100 bp are  
667 overlapped by CEs (18.5%), and thus longer introns are also likely to harbour some functional  
668 sites. Alongside regulatory sequences there are several possible explanations for this, including  
669 the presence of intronic RNA genes (Chen et al. 2008; Valli et al. 2016) and other categories of  
670 AS (e.g. alternative acceptor or donor splice sites) (Raj-Kumar et al. 2017).

671  
672 Finally, we further identified 5,611 ultraconserved elements (UCEs) spanning 356.0 kb of the *C.*  
673 *reinhartii* genome, defined as sequences  $\geq 50$  bp exhibiting 100% sequence conservation  
674 across the three *Chlamydomonas* species. A subset of just 55 UCEs exhibited  $\geq 95\%$  sequence  
675 conservation across all eight species, indicating that hardly any sequence is expected to be  
676 conserved to this level across the core-*Reinhardtinia*. The vast majority of UCE bases (96.0%)  
677 overlapped CDS, indicating constraint at both nonsynonymous and synonymous sites. There are  
678 several reasons why synonymous sites may be subject to such strong constraint, including  
679 interactions with RNA processing or formation of RNA secondary structures, the presence of  
680 exonic regulatory elements, or selection for optimal codon usage. Noticeably, 15 of the 55 core-

681 *Reinhardtina* UCEs overlapped ribosomal protein genes, which are often used as a standard for  
682 identifying optimal codons given their extremely high gene expression (Sharp and Li 1987), and  
683 several of the other genes overlapped by UCEs are also expected to be very highly expressed  
684 (e.g. elongation factors) (table S11). Although considered to be a very weak evolutionary force,  
685 this indicates that coordinated selection for optimal codons across the core-*Reinhardtina* may be  
686 driving extreme sequence conservation. UCEs have proved to be excellent phylogenetic markers  
687 across several taxa (Faircloth et al. 2012; Faircloth et al. 2015). Given the lack of nuclear  
688 markers and the current difficulty in determining phylogenetic relationships in the core-  
689 *Reinhardtina*, the 55 deeply conserved elements could potentially be used to provide additional  
690 phylogenetic resolution.

691

## 692 **Conclusions**

693

694 Via the assembly of highly contiguous and well-annotated genomes for three of *C. reinhardtii*'s  
695 unicellular relatives, we have presented the first nucleotide-level comparative genomics  
696 framework for this important model organism. These resources are expected to enable the  
697 continued development of *C. reinhardtii* as a model system for molecular evolution.

698 Furthermore, by providing insights into the gene content and genomic architecture of unicellular  
699 core-*Reinhardtina* species, they are also expected to advance our understanding of the genomic  
700 changes that have occurred during the transition to multicellularity in the TGV clade.

701

702 Despite such advances, these genome assemblies have only now raised *C. reinhardtii* to a  
703 standard that had been achieved for many other model organisms ten or more years ago. Many of  
704 the analyses we have performed could be greatly enhanced by the inclusion of additional  
705 *Chlamydomonas* species, but addressing this is a question of taxonomy rather than sequencing  
706 effort. This is somewhat analogous to the past situation for *Caenorhabditis*, where only very  
707 recent advances in ecological knowledge have led to a rapid increase in the number of sampled  
708 species and sequenced genomes (Stevens et al. 2019). We hope that this study will encourage  
709 *Chlamydomonas* researchers to increase sampling efforts for new species, fully enabling the  
710 power of comparative genomics analyses to be realised for the species.

711

## 712 **Methods**

713

### 714 *Nucleic acid extraction and sequencing*

715

716 Isolates were obtained from the SAG or CCAP culture centres, cultured in Bold's Basal Medium,  
717 and where necessary made axenic via serial dilution, plating on agar, and isolation of single algal  
718 colonies. High molecular weight DNA was extracted using a customised extension of an existing  
719 CTAB/phenol-chloroform protocol (file S1). One SMRTbell library (sheared to ~20 kb, with 15-  
720 50 kb size selection) was prepared per species, and each library was sequenced on a single  
721 SMRTcell on the PacBio Sequel platform. PacBio library preparation and sequencing were  
722 performed by Edinburgh Genomics.

723

724 DNA for Illumina sequencing was extracted using a phenol-chloroform protocol (Ness et al.  
725 2012). Across all species a variety of library preparations, read lengths, insert sizes and  
726 sequencing platforms were used (table S2). RNA was extracted from four-day liquid cultures  
727 using Zymo Research TRI Reagent (product ID: R2050) and the Direct-zol RNA Miniprep Plus  
728 kit (product ID: R2070) following user instructions. One stranded RNA-seq library was prepared  
729 for each species using TruSeq reagents, and sequencing was performed on the Illumina HiSeq X  
730 platform (*Chlamydomonas incerta* 150 bp paired-end, *Chlamydomonas schloesseri* and  
731 *Edaphochlamys debaryana* 100 bp paired-end). All Illumina sequencing and library preparations  
732 were performed by BGI Hong Kong.

733

### 734 *De novo genome assembly*

735

736 Detailed per-species methods and command line options are detailed in file S2. We first  
737 identified and removed reads derived from any contaminants by producing taxon-annotated GC-  
738 coverage plots with BlobTools v1.0 (Laetsch and Blaxter 2017a). Assemblies were produced  
739 using Canu v1.7.1 (Koren et al. 2017), with three iterative round of error-correction performed  
740 with the PacBio reads and the GenomicConsensus module Arrow v2.3.2  
741 (<https://github.com/PacificBiosciences/GenomicConsensus>). All available Illumina data for each  
742 species was subsequently used to perform three iterative rounds of polishing using Pilon v1.22

743 (Walker et al. 2014). Assemblies of the plastid and mitochondrial genomes were produced  
744 independently and will be described elsewhere.

745

#### 746 *Annotation of genes and repetitive elements*

747

748 A preliminary repeat library was produced for each species with RepeatModeler v1.0.11 (Smit  
749 and Hubley 2008-2015). Repeat models with homology to *Chlamydomonas reinhardtii* v5.6  
750 and/or *Volvox carteri* v2.1 transcripts (e-values <10<sup>-3</sup>, megablast (Camacho et al. 2009)) were  
751 filtered. The genomic abundance of each repeat model was estimated by providing  
752 RepeatMasker v4.0.9 (Smit et al. 2013-2015) with the filtered RepeatModeler output as a custom  
753 library, and any TEs with a cumulative total >100 kb were selected for manual curation,  
754 following Suh et al. (2014). Briefly, multiple copies of a given TE were retrieved by querying  
755 the appropriate reference genome using megablast, before each copy was extended at both flanks  
756 and aligned using MAFFT v7.245 (Kato and Standley 2013). Alignments were then manually  
757 inspected, consensus sequences were created, and TE families were classified following Wicker  
758 et al. (2007) and Kapitonov and Jurka (2008). This procedure was also performed exhaustively  
759 for *C. reinhardtii* (i.e. curating all repeat models regardless of genomic abundance), which will  
760 be described in detail elsewhere. Final repeat libraries were made by combining the  
761 RepeatModeler output for a given species with all novel curated TEs and *V. carteri* repeats from  
762 Repbase (Bao et al. 2015) (files S3 and S4). TEs and satellites were soft-masked by providing  
763 RepeatMasker with the above libraries. In line with the most recent *C. reinhardtii* annotation  
764 (Blaby et al. 2014), low-complexity and simple repeats were not masked as the high GC-content  
765 of genuine coding sequence can result in excessive masking.

766

767 Adapters and low-quality bases were trimmed from each RNA-seq dataset using Trimmomatic  
768 v0.38 (Bolger et al. 2014) with the parameters optimised by Macmanes (2014). Trimmed reads  
769 were mapped to repeat-masked assemblies with the 2-pass mode of STAR v2.6.1a (Dobin et al.  
770 2013). Gene annotation was performed with BRAKER v2.1.2 (Hoff et al. 2016; Hoff et al.  
771 2019), an automated pipeline that combines the gene prediction tools Genemark-ET (Lomsadze  
772 et al. 2014) and AUGUSTUS (Stanke et al. 2006; Stanke et al. 2008). Read pairs mapping to the  
773 forward and reverse strands were extracted using samtools v1.9 (Li et al. 2009) and passed as

774 individual BAM files to BRAKER, which was run with the “--UTR=on” and “--stranded=+,- ”  
775 flags to perform UTR annotation. Resulting gene models were filtered for genes with internal  
776 stop codons, protein sequences <30 amino acids, or CDS overlapped by >=30% TEs/satellites or  
777 >=70% low-complexity/simple repeats.

778

779 Proteins were functionally annotated via upload to the Phycocosm algal genomics portal  
780 (<https://phycocosm.jgi.doe.gov>). Phycocosm uses an array of tools to add detailed annotation  
781 (gene ontology terms, Pfam domains, etc.), and additionally provides a genome browser interface  
782 to enable visualisation.

783

784 *Phylogenomics analyses*

785

786 Genome and gene annotations for all available *Reinhardtinia* species and selected outgroups  
787 (tables S3, S4) were accessed from either Phytozome (if available) or NCBI. For annotation  
788 based analyses, protein clustering analysis was performed with OrthoFinder v2.2.7 (Emms and  
789 Kelly 2015), using the longest isoform for each gene, the modified BLASTp options “-seq yes, -  
790 soft\_masking true, -use\_sw\_tback” (following Moreno-Hagelsieb and Latimer (2008)) and the  
791 default inflation value of 1.5. Protein sequences from orthogroups containing a single gene in all  
792 11 included species (i.e. putative single copy-orthologs) were aligned with MAFFT and trimmed  
793 for regions of low-quality alignment using trimAl v1.4.rev15 (“-automated1”) (Capella-Gutiérrez  
794 et al. 2009). A ML species-tree was produced using concatenated gene alignments with IQ-  
795 TREE v1.6.9 (Nguyen et al. 2015), run with ModelFinder (“-m MFP”) (Kalyaanamoorthy et al.  
796 2017) and ultrafast bootstrapping (“-bb 1000”) (Hoang et al. 2018). ASTRAL-III v5.6.3 (Zhang  
797 et al. 2018) was used to produce an alternative species-tree from individual gene-trees, which  
798 were themselves produced for each aligned single copy-ortholog using IQ-TREE as described  
799 above, with any branches with bootstrap support <10% contracted as recommended.

800

801 Annotation-free phylogenies were produced from a dataset of single-copy orthologous genes  
802 identified by BUSCO v3.0.2 (Waterhouse et al. 2018) run in genome mode with the pre-release  
803 Chlorophyta odb10 dataset (allowing missing data in up to three species). For each BUSCO

804 gene, proteins were aligned and trimmed, and two species-trees were produced as described  
805 above.

806

### 807 *General comparative genomics and synteny analyses*

808

809 Basic genome assembly metrics were generated using QUAST v5.0.0 (Gurevich et al. 2013).

810 Repeat content was estimated by performing repeat masking on all genomes as described above

811 (i.e. supplying RepeatMasker with the RepeatModeler output for a given species + manually

812 curated repeats from all species). Assembly completeness was assessed by running BUSCO in

813 genome mode with the Eukaryota odb9 and Chlorophyta odb10 datasets. Each species was run

814 with *C. reinhardtii* (-sp chlamy2011) and *V. carteri* (-sp volvox) AUGUSTUS parameters, and

815 the run with the most complete BUSCO genes was retained.

816

817 Synteny segments were identified between *C. reinhardtii* and the three novel genomes using

818 SynChro (Drillon et al. 2014) with a block stringency value (delta) of 2. To create the input file

819 for *C. reinhardtii*, we combined the repeat-filtered v5.6 gene annotation (see below) with the

820 centromere locations for 15 of the 17 chromosomes, as defined by Lin et al. (2018). The

821 resulting synteny blocks were used to check the *C. incerta* and *C. schloesseri* genomes for

822 misassemblies, by manually inspecting breakpoints between synteny blocks on a given contig

823 that resulted in a transition between *C. reinhardtii* chromosomes (see file S2). This resulted in

824 four *C. incerta* and two *C. schloesseri* contigs being split due to likely misassembly.

825

826 A ML phylogeny of L1 LINE elements was produced from the endonuclease and reverse

827 transcriptase domains (i.e. ORF2) of all known chlorophyte L1 elements. Protein sequences were

828 aligned, trimmed and analysed with IQ-TREE as described above. All *C. incerta*, *C. schloesseri*

829 and *E. debaryana* elements were manually curated as part of the annotation of repeats (see

830 above). The *Yamagishiella unicocca*, *Eudorina* sp., and *V. carteri* genomes were searched using

831 tBLASTn with the L1-1\_CR protein sequence as query, and the best hits were manually curated

832 to assess the presence or absence of ZeppL elements in these species.

833

834



835 *Gene annotation metrics and gene family evolution*

836

837 The *C. reinhardtii* v5.6 gene models were manually filtered based on overlap with the novel  
838 repeat library (files S3 and S4), which resulted in the removal of 1,085 putative TE genes. For all  
839 species, annotation completeness was assessed by protein mode BUSCO analyses using the  
840 Eukaryota odb9 and Chlorophyta odb10 datasets. Gene families were identified using  
841 OrthoFinder as described above with the six core-*Reinhardtinia* species with gene annotations  
842 (*C. reinhardtii*, *C. incerta*, *C. schloesseri*, *E. debaryana*, *G. pectorale* and *V. carteri*). Protein  
843 sequences for all species were annotated with InterPro domain IDs using InterProScan v5.39-  
844 77.0 (Jones et al. 2014). Domain IDs were assigned to orthogroups by KinFin v1.0 (Laetsch and  
845 Blaxter 2017b) if a particular ID was assigned to at least 20% of the genes and present in at least  
846 50% of the species included in the orthogroup.

847

848 *Mating-type locus evolution*

849

850 As the three novel genomes are all MT- and the *C. reinhardtii* reference genome is MT+, we first  
851 obtained the *C. reinhardtii* MT- locus and proteins from NCBI (accession GU814015.1) and  
852 created a composite chromosome 6 with an MT- haplotype. A reciprocal best hit approach with  
853 BLASTp was used to identify orthologs, supplemented with tBLASTn queries to search for  
854 genes not present in the annotations. To visualise synteny, we used the MCscan pipeline from the  
855 JCVI utility libraries v0.9.14 (Tang et al. 2008), which performs nucleotide alignment with  
856 LAST (Kiełbasa et al. 2011) to identify orthologs. We applied a C-score of 0.99, which filters  
857 LAST hits to only reciprocal best hits, while otherwise retaining default parameters. We  
858 manually confirmed that the LAST reciprocal hits were concordant with our BLASTp results.  
859 Scripts and data for this analysis are available at:

860 [https://github.com/aays/MT\\_analysis](https://github.com/aays/MT_analysis)

861

862 *Core-Reinhardtinia whole-genome alignment and estimation of putatively neutral divergence*

863

864 An 8-species core-*Reinhardtinia* WGA was produced using Cactus (Armstrong et al. 2019) with  
865 all available high-quality genomes (*C. reinhardtii* v5, *C. incerta*, *C. schloesseri*, *E. debaryana*,



866 *Gonium pectorale*, *Y. unicocca*, *Eudorina sp.* and *V. carteri* v2). The required guide phylogeny  
867 was produced by extracting alignments of 4D sites from single-copy orthologs identified by  
868 BUSCO (genome mode, Chlorophyta odb10 dataset). Protein sequences of 1,543 BUSCO genes  
869 present in all eight species were aligned with MAFFT and subsequently back-translated to  
870 nucleotide sequences. Sites where the aligned codon in all eight species contained a 4D site were  
871 then extracted (250,361 sites), and a guide-phylogeny was produced by supplying the 4D site  
872 alignment and topology (extracted from the Volvocales species-tree, see above) to phyloFit  
873 (PHAST v1.4) (Siepel et al. 2005), which was run with default parameters (i.e. GTR substitution  
874 model).

875

876 Where available the R domain of the MT locus not included in a given assembly was appended  
877 as an additional contig (extracted from the following NCBI accessions: *C. reinhardtii* MT-  
878 GU814015.1, *G. pectorale* MT+ LC062719.1, *Y. unicocca* MT- LC314413.1, *Eudorina sp.* MT  
879 male LC314415.1, *V. carteri* MT male GU784916.1). All genomes were softmasked for repeats  
880 as described above, and Cactus was run using the guide-phylogeny and all genomes set as  
881 reference quality. Post-processing was performed by extracting a multiple alignment format  
882 (MAF) alignment with *C. reinhardtii* as the reference genome from the resulting hierarchical  
883 alignment (HAL) file, using the HAL tools command hal2maf (v2.1) (Hickey et al. 2013), with  
884 the options `-onlyOrthologs` and `-noAncestors`. Paralogous alignments were reduced to one  
885 sequence per species by retaining the sequence with the highest similarity to the consensus of the  
886 alignment block, using mafDuplicateFilter (mafTools suite v0.1) (Earl et al. 2014).

887

888 Final estimates of putatively neutral divergence were obtained using a method adopted from  
889 Green et al. (2014). For each *C. reinhardtii* protein-coding gene, the alignment of each exon was  
890 extracted and concatenated. For the subsequent CDS alignments, a site was considered to be 4D  
891 if the codon in *C. reinhardtii* included a 4D site, and all seven other species had a triplet of  
892 aligned bases that also included a 4D site at the same position (i.e. the aligned triplet was  
893 assumed to be a valid codon, based on its alignment to a *C. reinhardtii* codon). The resulting  
894 alignment of 1,552,562 sites were then passed to phyloFit with the species tree, as described  
895 above.

896

897 *Identification of novel Chlamydomonas reinhardtii genes*

898

899 *De novo* gene annotation was performed on the *C. reinhardtii* v5 genome using BRAKER  
900 (without UTR annotation) and all RNA-seq datasets produced by Strenkert et al. (2019).  
901 Potential novel genes were defined as those without any overlap with CDS of v5.6 genes. To  
902 determine if any novel predictions had syntenic homologs within *Chlamydomonas*, SynChro was  
903 re-run against *C. incerta* and *C. schloesseri* using updated *C. reinhardtii* input files containing  
904 the potential novel genes. Coding potential was assessed by passing CDS alignments extracted  
905 from the WGA to phyloCSF (Lin et al. 2011), which was run in “omega” mode using the neutral  
906 branch length tree from phyloFit.

907

908 *Identification and analyses of conserved elements*

909

910 CEs were identified from the 8-species WGA using phastCons (Siepel et al. 2005) with the  
911 phyloFit neutral model (described above) and the standard UCSC parameters “--expected-  
912 length=45, --target-coverage=0.3, --rho=0.31”. Parameter tuning was attempted, but it proved  
913 difficult to achieve a balance between overly long CEs containing too many non-constrained  
914 bases at one extreme, and overly fragmented CEs at the other, and the standard parameters were  
915 found to perform as adequately as others.

916

917 *C. reinhardtii* site classes were delineated using the repeat-filtered v5.6 annotation, augmented  
918 with the 142 novel genes identified (file S5). To assess the genomic distribution of conserved  
919 bases, site classes were called uniquely in a hierarchical manner, so that if a site was annotated as  
920 more than one site class it was called based on the following hierarchy: CDS, 5' UTR, 3' UTR,  
921 intronic, intergenic. Overlaps between site classes and CEs were calculated using BEDtools  
922 v2.26.0 (Quinlan and Hall 2010). Genetic diversity was calculated from re-sequencing data of 17  
923 *C. reinhardtii* field isolates from Quebec, as described by Craig et al. (2019). For analyses of  
924 intron length and conservation, all introns were called based on longest isoforms as they appear  
925 in the annotation (i.e. no hierarchical calling was performed as described above).

926

927

928 **Supplementary files**

929

930 supplementary\_tables.xlsx

931 file\_S1.pdf: high molecular weight DNA extraction protocol for *Chlamydomonas*.

932 file\_S2.pdf: detailed genome assembly methods.

933 file\_S3.fa: Volvocales curated TE library.

934 file\_S4.xlsx: Volvocales curated TE annotation notes.

935 file\_S5.gff3: *C. reinhardtii* v5.6 gene annotation, filtered for TE/repeat genes and with newly  
936 identified genes added.

937 file\_S6.txt: OrthoFinder gene clustering used for phylogenomics analyses.

938 file\_S7.fa: aligned and trimmed OrthoFinder single-copy orthologs used for phylogenomics  
939 analyses.

940 file\_S8.nwk: IQ-TREE phylogeny produced from OrthoFinder single-copy orthologs.

941 file\_S9.nwk: ASTRAL-III phylogeny produced from OrthoFinder single-copy orthologs.

942 file\_S10.fa: aligned and trimmed chlorophyte BUSCO genes used for phylogenomics analyses.

943 file\_S11.nwk: IQ-TREE phylogeny produced from chlorophyte BUSCO genes.

944 file\_S12.nwk: ASTRAL-III phylogeny produced from chlorophyte BUSCO genes.

945 file\_S13.tsv: *C. reinhardtii* – *C. incerta* synteny blocks.

946 file\_S14.tsv: *C. reinhardtii* – *C. incerta* syntenic orthologs.

947 file\_S15.tsv: *C. reinhardtii* – *C. schloesseri* synteny blocks.

948 file\_S16.tsv: *C. reinhardtii* – *C. schloesseri* syntenic orthologs.

949 file\_S17.tsv: *C. reinhardtii* – *E. debaryana* synteny blocks.

950 file\_S18.tsv: *C. reinhardtii* – *E. debaryana* syntenic orthologs.

951 file\_S19.fa: chlorophyte L1 LINE proteins.

952 file\_S20.fa: aligned and trimmed chlorophyte L1 LINE proteins.

953 file\_S21.nwk: IQ-TREE phylogeny of chlorophyte L1 LINE proteins.

954 file\_S22.txt: OrthoFinder gene clustering of six core-*Reinhardtinia* species.

955 file\_S23.txt: InterProScan raw output for genes of six core-*Reinhardtinia* species.

956 file\_S24.tsv: InterPro domains associated with core-*Reinhardtinia* orthogroups.

957 file\_S25.bed: phastCons conserved elements in *C. reinhardtii* v5 coordinates.

958 file\_S26.bed: ultraconserved elements in *C. reinhardtii* v5 coordinates.

959 **Data availability**

960

961 The 8-species core-*Reinhardtinia* Cactus WGA and all genome assemblies and annotations are  
962 available from the Edinburgh Datashare repository (doi: <https://doi.org/10.7488/ds/2847>). All  
963 sequencing reads, genome assemblies and gene annotations will shortly be available from NCBI  
964 under the BioProject PRJNA633871. Code and bioinformatic pipelines are available at:  
965 [https://github.com/rorycraig337/Chlamydomonas\\_comparative\\_genomics](https://github.com/rorycraig337/Chlamydomonas_comparative_genomics)

966

967 **Acknowledgements**

968

969 We are indebted to Lewis Stevens, Dominik Laetsch and Mark Blaxter for their guidance and  
970 advice on all genomics matters. We thank Alexander Suh and Valentina Peona for their  
971 invaluable guidance on TE curation, Thomas Pröschold for providing isolate images and for  
972 useful discussions on taxonomy, and Olivier Vallon for useful discussions on chlorophyte  
973 genomics. We thank Susanne Kraemer and Jack Hearn for their work on an earlier version of the  
974 *C. incerta* genome. Rory Craig is supported by a BBSRC EASTBIO Doctoral Training  
975 Partnership grant. PacBio sequencing was funded by a NERC Biomolecular Analysis Facility  
976 Pilot Project Grant (NBAF1123).

977

978 **Author contributions**

979

980 RJC performed analyses and wrote the first draft of the manuscript, with the exception of the  
981 analyses and manuscript section on mating-type evolution, which were performed and written by  
982 ARH. RJC and RWN performed laboratory work. RJC, RWN and PDK conceived the study. All  
983 authors read and commented on the final draft version of the manuscript.

984

985 **References**

986

987 Alföldi J, Di Palma F, Grabherr M, Williams C, Kong LS, Mauceli E, Russell P, Lowe CB, Glor RE,  
988 Jaffe JD et al. 2011. The genome of the green anole lizard and a comparative analysis  
989 with birds and mammals. *Nature* **477**: 587-591.

- 990 Alföldi J, Lindblad-Toh K. 2013. Comparative genomics as a tool to understand evolution and  
991 disease. *Genome Res* **23**: 1063-1068.
- 992 Armstrong J, Hickey G, Diekhans M, Deran A, Fang Q, Xie D, Feng S, Stiller J, Genereux D,  
993 Johnson J et al. 2019. Progressive alignment with Cactus: a multiple-genome aligner for  
994 the thousand-genome era. *bioRxiv*.
- 995 Baier T, Wichmann J, Kruse O, Lauersen KJ. 2018. Intron-containing algal transgenes mediate  
996 efficient recombinant gene expression in the green microalga *Chlamydomonas*  
997 *reinhardtii*. *Nucleic Acids Res* **46**: 6909-6919.
- 998 Bao W, Jurka J. 2013. Homologues of bacterial TnpB\_IS605 are widespread in diverse eukaryotic  
999 transposable elements. *Mob DNA* **4**: 12.
- 1000 Bao W, Kojima KK, Kohany O. 2015. Repbase Update, a database of repetitive elements in  
1001 eukaryotic genomes. *Mobile DNA* **6**: 11.
- 1002 Blaby IK, Blaby-Haas CE, Tourasse N, Hom EF, Lopez D, Aksoy M, Grossman A, Umen J, Dutcher  
1003 S, Porter M et al. 2014. The *Chlamydomonas* genome project: a decade on. *Trends in*  
1004 *Plant Science* **19**: 672-680.
- 1005 Blaby-Haas CE, Merchant SS. 2019. Comparative and functional algal genomics. *Annual Review*  
1006 *of Plant Biology* **70**: 605-638.
- 1007 Blanc G, Agarkova I, Grimwood J, Kuo A, Brueggeman A, Dunigan DD, Gurnon J, Ladunga I,  
1008 Lindquist E, Lucas S et al. 2012. The genome of the polar eukaryotic microalga  
1009 *Coccomyxa subellipsoidea* reveals traits of cold adaptation. *Genome Biol* **13**.
- 1010 Böhne A, Zhou Q, Darras A, Schmidt C, Scharl M, Galiana-Arnoux D, Volff JN. 2012. Zisupton—a  
1011 novel superfamily of DNA transposable elements recently active in fish. *Mol Biol Evol* **29**:  
1012 631-645.
- 1013 Bolger AM, Lohse M, Usadel B. 2014. Trimmomatic: a flexible trimmer for Illumina sequence  
1014 data. *Bioinformatics* **30**: 2114-2120.
- 1015 Böndel KB, Kraemer SA, Samuels T, McClean D, Lachapelle J, Ness RW, Colegrave N, Keightley  
1016 PD. 2019. Inferring the distribution of fitness effects of spontaneous mutations in  
1017 *Chlamydomonas reinhardtii*. *PLoS Biol* **17**: e3000192.
- 1018 Camacho C, Coulouris G, Avagyan V, Ma N, Papadopoulos J, Bealer K, Madden TL. 2009. BLAST+:  
1019 architecture and applications. *BMC Bioinformatics* **10**: 421.
- 1020 Capella-Gutiérrez S, Silla-Martínez JM, Gabaldón T. 2009. trimAl: a tool for automated  
1021 alignment trimming in large-scale phylogenetic analyses. *Bioinformatics* **25**: 1972-1973.
- 1022 Chang CH, Chavan A, Palladino J, Wei XL, Martins NMC, Santinello B, Chen CC, Erceg J, Beliveau  
1023 BJ, Wu CT et al. 2019. Islands of retroelements are major components of *Drosophila*  
1024 centromeres. *PLoS Biol* **17**.
- 1025 Chen CL, Chen CJ, Vallon O, Huang ZP, Zhou H, Qu LH. 2008. Genomewide analysis of box C/D  
1026 and box H/ACA snoRNAs in *Chlamydomonas reinhardtii* reveals an extensive  
1027 organization into intronic gene clusters. *Genetics* **179**: 21-30.
- 1028 Cliften P, Sudarsanam P, Desikan A, Fulton L, Fulton B, Majors J, Waterston R, Cohen BA,  
1029 Johnston M. 2003. Finding functional features in *Saccharomyces* genomes by  
1030 phylogenetic footprinting. *Science* **301**: 71-76.
- 1031 Craig RJ, Böndel KB, Arakawa K, Nakada T, Ito T, Bell G, Colegrave N, Keightley PD, Ness RW.  
1032 2019. Patterns of population structure and complex haplotype sharing among field  
1033 isolates of the green alga *Chlamydomonas reinhardtii*. *Mol Ecol* **28**: 3977-3993.

- 1034 Csuros M, Rogozin IB, Koonin EV. 2011. A detailed history of intron-rich eukaryotic ancestors  
1035 inferred from a global survey of 100 complete genomes. *PLoS Comput Biol* **7**.
- 1036 De Hoff PL, Ferris P, Olson BJSC, Miyagi A, Geng S, Umen JG. 2013. Species and population level  
1037 molecular profiling reveals cryptic recombination and emergent asymmetry in the  
1038 dimorphic mating locus of *C. reinhardtii*. *PLoS Genet* **9**.
- 1039 Del Cortona A, Jackson CJ, Bucchini F, Van Bel M, D'hondt S, Skaloud P, Delwiche CF, Knoll AH,  
1040 Raven JA, Verbruggen H et al. 2020. Neoproterozoic origin and multiple transitions to  
1041 macroscopic growth in green seaweeds. *Proc Natl Acad Sci U S A* **117**: 2551-2559.
- 1042 Ding J, Li X, Hu H. 2012. Systematic prediction of cis-regulatory elements in the *Chlamydomonas*  
1043 *reinhardtii* genome using comparative genomics. *Plant Physiol* **160**: 613-623.
- 1044 Dobin A, Davis CA, Schlesinger F, Drenkow J, Zaleski C, Jha S, Batut P, Chaisson M, Gingeras TR.  
1045 2013. STAR: ultrafast universal RNA-seq aligner. *Bioinformatics* **29**: 15-21.
- 1046 Drillon G, Carbone A, Fischer G. 2014. SynChro: a fast and easy tool to reconstruct and visualize  
1047 synteny blocks along eukaryotic chromosomes. *PLoS One* **9**: e92621.
- 1048 Dvořáčková M, Fojtová M, Fajkus J. 2015. Chromatin dynamics of plant telomeres and  
1049 ribosomal genes. *Plant J* **83**: 18-37.
- 1050 Earl D, Nguyen N, Hickey G, Harris RS, Fitzgerald S, Beal K, Seledtsov I, Molodtsov V, Raney BJ,  
1051 Clawson H et al. 2014. Alignathon: a competitive assessment of whole-genome  
1052 alignment methods. *Genome Res* **24**: 2077-2089.
- 1053 Emms DM, Kelly S. 2015. OrthoFinder: solving fundamental biases in whole genome  
1054 comparisons dramatically improves orthogroup inference accuracy. *Genome Biol* **16**:  
1055 157.
- 1056 Faircloth BC, Branstetter MG, White ND, Brady SG. 2015. Target enrichment of ultraconserved  
1057 elements from arthropods provides a genomic perspective on relationships among  
1058 Hymenoptera. *Mol Ecol Resour* **15**: 489-501.
- 1059 Faircloth BC, McCormack JE, Crawford NG, Harvey MG, Brumfield RT, Glenn TC. 2012.  
1060 Ultraconserved elements anchor thousands of genetic markers spanning multiple  
1061 evolutionary timescales. *Syst Biol* **61**: 717-726.
- 1062 Fang Y, Coelho MA, Shu H, Schotanus K, Thimmappa BC, Yadav V, Chen H, Malc EP, Wang J,  
1063 Mieczkowski PA et al. 2020. Long transposon-rich centromeres in an oomycete reveal  
1064 divergence of centromere features in Stramenopila-Alveolata-Rhizaria lineages. *PLoS*  
1065 *Genet* **16**: e1008646.
- 1066 Farlow A, Meduri E, Schlotterer C. 2011. DNA double-strand break repair and the evolution of  
1067 intron density. *Trends Genet* **27**: 1-6.
- 1068 Featherston J, Arakaki Y, Hanschen ER, Ferris PJ, Michod RE, Olson B, Nozaki H, Durand PM.  
1069 2018. The 4-Celled *Tetrabaena socialis* nuclear genome reveals the essential  
1070 components for genetic control of cell number at the origin of multicellularity in the  
1071 volvocine lineage. *Mol Biol Evol* **35**: 855-870.
- 1072 Ferris P, Olson BJ, De Hoff PL, Douglass S, Casero D, Prochnik S, Geng S, Rai R, Grimwood J,  
1073 Schmutz J et al. 2010. Evolution of an expanded sex-determining locus in *Volvox*. *Science*  
1074 **328**: 351-354.
- 1075 Ferris PJ, Armbrust EV, Goodenough UW. 2002. Genetic structure of the mating-type locus of  
1076 *Chlamydomonas reinhardtii*. *Genetics* **160**: 181-200.



- 1077 Ferris PJ, Goodenough UW. 1997. Mating type in *Chlamydomonas* is specified by *mid*, the  
1078 minus-dominance gene. *Genetics* **146**: 859-869.
- 1079 Ferris PJ, Pavlovic C, Fabry S, Goodenough UW. 1997. Rapid evolution of sex-related genes in  
1080 *Chlamydomonas*. *Proc Natl Acad Sci U S A* **94**: 8634-8639.
- 1081 Fulnečková J, Hasíková T, Fajkus J, Lukešová A, Eliáš M, Sýkorová E. 2012. Dynamic evolution of  
1082 telomeric sequences in the green algal order Chlamydomonadales. *Genome Biol Evo* **4**:  
1083 248-264.
- 1084 Gel B, Serra E. 2017. karyoploteR: an R/Bioconductor package to plot customizable genomes  
1085 displaying arbitrary data. *Bioinformatics* **33**: 3088-3090.
- 1086 Gerstein MB Lu ZJ Van Nostrand EL Cheng C Arshinoff BI Liu T Yip KY Robilotto R Rechtsteiner A  
1087 Ikegami K et al. 2010. Integrative analysis of the *Caenorhabditis elegans* genome by the  
1088 modENCODE project. *Science* **330**: 1775-1787.
- 1089 Green RE, Braun EL, Armstrong J, Earl D, Nguyen N, Hickey G, Vandewege MW, St John JA,  
1090 Capella-Gutierrez S, Castoe TA et al. 2014. Three crocodylian genomes reveal ancestral  
1091 patterns of evolution among archosaurs. *Science* **346**: 1254449.
- 1092 Grossman AR, Harris EE, Hauser C, Lefebvre PA, Martinez D, Rokhsar D, Shrager J, Silflow CD,  
1093 Stern D, Vallon O et al. 2003. *Chlamydomonas reinhardtii* at the crossroads of genomics.  
1094 *Eukaryot Cell* **2**: 1137-1150.
- 1095 Gurevich A, Saveliev V, Vyahhi N, Tesler G. 2013. QUAST: quality assessment tool for genome  
1096 assemblies. *Bioinformatics* **29**: 1072-1075.
- 1097 Halligan DL, Keightley PD. 2006. Ubiquitous selective constraints in the *Drosophila* genome  
1098 revealed by a genome-wide interspecies comparison. *Genome Res* **16**: 875-884.
- 1099 Halligan DL, Kousathanas A, Ness RW, Harr B, Eory L, Keane TM, Adams DJ, Keightley PD. 2013.  
1100 Contributions of protein-coding and regulatory change to adaptive molecular evolution  
1101 in murid rodents. *PLoS Genet* **9**: e1003995.
- 1102 Hamaji T, Kawai-Toyooka H, Uchimura H, Suzuki M, Noguchi H, Minakuchi Y, Toyoda A,  
1103 Fujiyama A, Miyagishima S, Umen JG et al. 2018. Anisogamy evolved with a reduced sex-  
1104 determining region in volvocine green algae. *Communications Biology* **1**.
- 1105 Hamaji T, Lopez D, Pellegrini M, Umen J. 2016a. Identification and characterization of a *cis*-  
1106 regulatory element for zygotic gene expression in *Chlamydomonas reinhardtii*. *G3*  
1107 (*Bethesda*) **6**: 1541-1548.
- 1108 Hamaji T, Mogi Y, Ferris PJ, Mori T, Miyagishima S, Kabeya Y, Nishimura Y, Toyoda A, Noguchi H,  
1109 Fujiyama A et al. 2016b. Sequence of the *Gonium pectorale* mating locus reveals a  
1110 complex and dynamic history of changes in volvocine algal mating haplotypes. *G3*  
1111 (*Bethesda*) **6**: 1179-1189.
- 1112 Hanschen ER, Marriage TN, Ferris PJ, Hamaji T, Toyoda A, Fujiyama A, Neme R, Noguchi H,  
1113 Minakuchi Y, Suzuki M et al. 2016. The *Gonium pectorale* genome demonstrates co-  
1114 option of cell cycle regulation during the evolution of multicellularity. *Nat Commun* **7**:  
1115 11370.
- 1116 Harris EH, Boynton JE, Gillham NW, Burkhardt BD, Newman SM. 1991. Chloroplast genome  
1117 organization in *Chlamydomonas*. *Arch Protistenkd* **139**: 183-192.
- 1118 Hasan AR, Duggal JK, Ness RW. 2019. Consequences of recombination for the evolution of the  
1119 mating type locus in *Chlamydomonas reinhardtii*. *New Phytologist*  
1120 doi:10.1111/nph.16003.



- 1121 Hasan AR, Ness RW. 2020. Recombination rate variation and infrequent sex influence genetic  
1122 diversity in *Chlamydomonas reinhardtii*. *Genome Biol Evol* doi:10.1093/gbe/evaa057.
- 1123 Herron MD, Hackett JD, Aylward FO, Michod RE. 2009. Triassic origin and early radiation of  
1124 multicellular volvocine algae. *Proc Natl Acad Sci U S A* **106**: 3254-3258.
- 1125 Hickey G, Paten B, Earl D, Zerbino D, Haussler D. 2013. HAL: a hierarchical format for storing  
1126 and analyzing multiple genome alignments. *Bioinformatics* **29**: 1341-1342.
- 1127 Higashiyama T, Noutoshi Y, Fujie M, Yamada T. 1997. Zepp, a LINE-like retrotransposon  
1128 accumulated in the *Chlorella* telomeric region. *EMBO J* **16**: 3715-3723.
- 1129 Hiller M, Agarwal S, Notwell JH, Parikh R, Guturu H, Wenger AM, Bejerano G. 2013.  
1130 Computational methods to detect conserved non-genic elements in phylogenetically  
1131 isolated genomes: application to zebrafish. *Nucleic Acids Res* **41**: e151.
- 1132 Hirashima T, Tajima N, Sato N. 2016. Draft genome sequences of four species of  
1133 *Chlamydomonas* containing phosphatidylcholine. *Microbiol Resour Ann* **4**.
- 1134 Hoang DT, Chernomor O, von Haeseler A, Minh BQ, Vinh LS. 2018. UFBoot2: improving the  
1135 ultrafast bootstrap approximation. *Mol Biol Evol* **35**: 518-522.
- 1136 Hoff KJ, Lange S, Lomsadze A, Borodovsky M, Stanke M. 2016. BRAKER1: unsupervised RNA-  
1137 Seq-based genome annotation with GeneMark-ET and AUGUSTUS. *Bioinformatics* **32**:  
1138 767-769.
- 1139 Hoff KJ, Lomsadze A, Borodovsky M, Stanke M. 2019. Whole-genome annotation with BRAKER.  
1140 *Methods in Molecular Biology* **1962**: 65-95.
- 1141 Howell SH. 1972. The differential synthesis and degradation of ribosomal DNA during the  
1142 vegetative cell-cycle in *Chlamydomonas reinhardi*. *Nature New Biology* **240**: 264-267.
- 1143 Iyer LM, Zhang DP, de Souza RF, Pukkila PJ, Rao A, Aravind L. 2014. Lineage-specific expansions  
1144 of TET/JBP genes and a new class of DNA transposons shape fungal genomic and  
1145 epigenetic landscapes. *Proc Natl Acad Sci U S A* **111**: 1676-1683.
- 1146 Jones P, Binns D, Chang HY, Fraser M, Li W, McAnulla C, McWilliam H, Maslen J, Mitchell A,  
1147 Nuka G et al. 2014. InterProScan 5: genome-scale protein function classification.  
1148 *Bioinformatics* **30**: 1236-1240.
- 1149 Kalyanamoorthy S, Minh BQ, Wong TKF, von Haeseler A, Jeremiin LS. 2017. ModelFinder: fast  
1150 model selection for accurate phylogenetic estimates. *Nat Methods* **14**: 587-589.
- 1151 Kapitonov VV, Jurka J. 2008. A universal classification of eukaryotic transposable elements  
1152 implemented in Repbase. *Nat Rev Genet* **9**: 411-412; author reply 414.
- 1153 Katoh K, Standley DM. 2013. MAFFT multiple sequence alignment software version 7:  
1154 improvements in performance and usability. *Mol Biol Evol* **30**: 772-780.
- 1155 Keightley PD, Jackson BC. 2018. Inferring the probability of the derived vs. the ancestral allelic  
1156 state at a polymorphic Site. *Genetics* **209**: 897-906.
- 1157 Kiełbasa SM, Wan R, Sato K, Horton P, Frith MC. 2011. Adaptive seeds tame genomic sequence  
1158 comparison. *Genome Res* **21**: 487-493.
- 1159 Kojima KK, Fujiwara H. 2005. An extraordinary retrotransposon family encoding dual  
1160 endonucleases. *Genome Res* **15**: 1106-1117.
- 1161 Koren S, Walenz BP, Berlin K, Miller JR, Bergman NH, Phillippy AM. 2017. Canu: scalable and  
1162 accurate long-read assembly via adaptive k-mer weighting and repeat separation.  
1163 *Genome Res* **27**: 722-736.

- 1164 Krzywinski M, Schein J, Birol I, Connors J, Gascoyne R, Horsman D, Jones SJ, Marra MA. 2009.  
1165       Circos: an information aesthetic for comparative genomics. *Genome Res* **19**: 1639-1645.
- 1166 Laetsch DR, Blaxter M. 2017a. BlobTools: interrogation of genome assemblies. *F1000Research*  
1167       **6**.
- 1168 Laetsch DR, Blaxter ML. 2017b. KinFin: software for taxon-aware analysis of clustered protein  
1169       sequences. *G3 (Bethesda)* **7**: 3349-3357.
- 1170 Lex A, Gehlenborg N, Strobel H, Vuillemot R, Pfister H. 2014. UpSet: visualization of  
1171       intersecting sets. *IEEE Trans Vis Comput Graph* **20**: 1983-1992.
- 1172 Li H, Handsaker B, Wysoker A, Fennell T, Ruan J, Homer N, Marth G, Abecasis G, Durbin R,  
1173       Genome Project Data Processing S. 2009. The Sequence Alignment/Map format and  
1174       SAMtools. *Bioinformatics* **25**: 2078-2079.
- 1175 Lin H, Cliften PF, Dutcher SK. 2018. MAPINS, a highly efficient detection method that identifies  
1176       insertional mutations and complex DNA rearrangements. *Plant Physiol* **178**: 1436-1447.
- 1177 Lin MF, Deoras AN, Rasmussen MD, Kellis M. 2008. Performance and scalability of  
1178       discriminative metrics for comparative gene identification in 12 *Drosophila* genomes.  
1179       *PLoS Comput Biol* **4**: e1000067.
- 1180 Lin MF, Jungreis I, Kellis M. 2011. PhyloCSF: a comparative genomics method to distinguish  
1181       protein coding and non-coding regions. *Bioinformatics* **27**: i275-282.
- 1182 Lindblad-Toh K, Garber M, Zuk O, Lin MF, Parker BJ, Washietl S, Kheradpour P, Ernst J, Jordan G,  
1183       Mauceli E et al. 2011. A high-resolution map of human evolutionary constraint using 29  
1184       mammals. *Nature* **478**: 476-482.
- 1185 Liu H, Huang J, Sun X, Li J, Hu Y, Yu L, Liti G, Tian D, Hurst LD, Yang S. 2018. Tetrad analysis in  
1186       plants and fungi finds large differences in gene conversion rates but no GC bias. *Nat Ecol*  
1187       *Evol* **2**: 164-173.
- 1188 Lomsadze A, Burns PD, Borodovsky M. 2014. Integration of mapped RNA-Seq reads into  
1189       automatic training of eukaryotic gene finding algorithm. *Nucleic Acids Res* **42**: e119.
- 1190 Lowe CB, Kellis M, Siepel A, Raney BJ, Clamp M, Salama SR, Kingsley DM, Lindblad-Toh K,  
1191       Haussler D. 2011. Three periods of regulatory innovation during vertebrate evolution.  
1192       *Science* **333**: 1019-1024.
- 1193 Macmanes MD. 2014. On the optimal trimming of high-throughput mRNA sequence data.  
1194       *Frontiers in Genetics* **5**: 13.
- 1195 Marco Y, Rochaix JD. 1980. Organization of the nuclear ribosomal DNA of *Chlamydomonas*  
1196       *reinhardtii*. *Mol Gen Genet* **177**: 715-723.
- 1197 Margulies EH, Chen CW, Green ED. 2006. Differences between pair-wise and multi-sequence  
1198       alignment methods affect vertebrate genome comparisons. *Trends Genet* **22**: 187-193.
- 1199 Merchant SS Prochnik SE Vallon O Harris EH Karpowicz SJ Witman GB Terry A Salamov A Fritz-  
1200       Laylin LK Marechal-Drouard L et al. 2007. The *Chlamydomonas* genome reveals the  
1201       evolution of key animal and plant functions. *Science* **318**: 245-250.
- 1202 Mikkelsen TS, Wakefield MJ, Aken B, Amemiya CT, Chang JL, Duke S, Garber M, Gentles AJ,  
1203       Goodstadt L, Heger A et al. 2007. Genome of the marsupial *Monodelphis domestica*  
1204       reveals innovation in non-coding sequences. *Nature* **447**: 167-177.
- 1205 Moreno-Hagelsieb G, Latimer K. 2008. Choosing BLAST options for better detection of orthologs  
1206       as reciprocal best hits. *Bioinformatics* **24**: 319-324.

- 1207 Mouse Genome Sequencing Consortium. 2002. Initial sequencing and comparative analysis of  
1208 the mouse genome. *Nature* **420**: 520-562.
- 1209 Mudge JM, Jungreis I, Hunt T, Gonzalez JM, Wright JC, Kay M, Davidson C, Fitzgerald S, Seal R,  
1210 Tweedie S et al. 2019. Discovery of high-confidence human protein-coding genes and  
1211 exons by whole-genome PhyloCSF helps elucidate 118 GWAS loci. *Genome Res* **29**: 2073-  
1212 2087.
- 1213 Nakada T, Ito T, Tomita M. 2016. 18S ribosomal RNA gene phylogeny of a colonial volvoclean  
1214 lineage (*Tetrabaenaceae-Goniaceae-Volvocaceae*, *Volvocales*, *Chlorophyceae*) and its  
1215 close relatives. *The Journal of Japanese Botany* **91**: 345-354.
- 1216 Nakada T, Misawa K, Nozaki H. 2008. Molecular systematics of Volvocales (Chlorophyceae,  
1217 Chlorophyta) based on exhaustive 18S rRNA phylogenetic analyses. *Molecular*  
1218 *Phylogenetics and Evolution* **48**: 281-291.
- 1219 Nakada T, Tsuchida Y, Tomita M. 2019. Improved taxon sampling and multigene phylogeny of  
1220 unicellular chlamydomonads closely related to the colonial volvoclean lineage  
1221 *Tetrabaenaceae-Goniaceae-Volvocaceae* (Volvocales, Chlorophyceae). *Molecular*  
1222 *Phylogenetics and Evolution* **130**: 1-8.
- 1223 Nelson DR, Chaiboonchoe A, Fu W, Hazzouri KM, Huang Z, Jaiswal A, Daakour S, Mystikou A,  
1224 Arnoux M, Sultana M et al. 2019. Potential for heightened sulfur-metabolic capacity in  
1225 coastal subtropical microalgae. *iScience* **11**: 450-465.
- 1226 Ness RW, Kraemer SA, Colegrave N, Keightley PD. 2016. Direct estimate of the spontaneous  
1227 mutation rate uncovers the effects of drift and recombination in the *Chlamydomonas*  
1228 *reinhardtii* plastid genome. *Mol Biol Evol* **33**: 800-808.
- 1229 Ness RW, Morgan AD, Colegrave N, Keightley PD. 2012. Estimate of the spontaneous mutation  
1230 rate in *Chlamydomonas reinhardtii*. *Genetics* **192**: 1447-1454.
- 1231 Ness RW, Morgan AD, Vasanthakrishnan RB, Colegrave N, Keightley PD. 2015. Extensive de  
1232 novo mutation rate variation between individuals and across the genome of  
1233 *Chlamydomonas reinhardtii*. *Genome Res* **25**: 1739-1749.
- 1234 Nguyen LT, Schmidt HA, von Haeseler A, Minh BQ. 2015. IQ-TREE: a fast and effective stochastic  
1235 algorithm for estimating maximum-likelihood phylogenies. *Mol Biol Evol* **32**: 268-274.
- 1236 Peska V, Garcia S. 2020. Origin, diversity, and evolution of telomere sequences in plants. *Front*  
1237 *Plant Sci* **11**: 117.
- 1238 Plecenikova A, Slaninova M, Riha K. 2014. Characterization of DNA repair deficient strains of  
1239 *Chlamydomonas reinhardtii* generated by insertional mutagenesis. *Plos One* **9**.
- 1240 Popescu CE, Borza T, Bielawski JP, Lee RW. 2006. Evolutionary rates and expression level in  
1241 *Chlamydomonas*. *Genetics* **172**: 1567-1576.
- 1242 Poulter RTM, Butler MI. 2015. Tyrosine recombinase retrotransposons and transposons.  
1243 *Microbiol Spectr* **3**: MDNA3-0036-2014.
- 1244 Prochnik SE, Umen J, Nedelcu AM, Hallmann A, Miller SM, Nishii I, Ferris P, Kuo A, Mitros T,  
1245 Fritz-Laylin LK et al. 2010. Genomic analysis of organismal complexity in the multicellular  
1246 green alga *Volvox carteri*. *Science* **329**: 223-226.
- 1247 Pröschold T, Darienko T, Krienitz L, Coleman AW. 2018. *Chlamydomonas schloesseri* sp nov  
1248 (Chlamydomonadales, Chlorophyta) revealed by morphology, autolysin cross experiments,  
1249 and multiple gene analyses. *Phytotaxa* **362**: 21-38.

- 1250 Pröschold T, Harris EH, Coleman AW. 2005. Portrait of a species: *Chlamydomonas reinhardtii*.  
1251 *Genetics* **170**: 1601-1610.
- 1252 Pröschold T, Marin B, Schlösser UG, Melkonian M. 2001. Molecular phylogeny and taxonomic  
1253 revision of *Chlamydomonas* (Chlorophyta). I. Emendation of *Chlamydomonas* Ehrenberg  
1254 and *Chloromonas* Gobi, and description of *Oogamochlamys* gen. nov. and *Lobochlamys*  
1255 gen. nov. *Protist* **152**: 265-300.
- 1256 Quinlan AR, Hall IM. 2010. BEDTools: a flexible suite of utilities for comparing genomic features.  
1257 *Bioinformatics* **26**: 841-842.
- 1258 Raj-Kumar PK, Vallon O, Liang C. 2017. *In silico* analysis of the sequence features responsible for  
1259 alternatively spliced introns in the model green alga *Chlamydomonas reinhardtii*. *Plant*  
1260 *Mol Biol* **94**: 253-265.
- 1261 Richards S, Liu Y, Bettencourt BR, Hradecky P, Letovsky S, Nielsen R, Thornton K, Hubisz MJ,  
1262 Chen R, Meisel RP et al. 2005. Comparative genome sequencing of *Drosophila*  
1263 *pseudoobscura*: chromosomal, gene, and cis-element evolution. *Genome Res* **15**: 1-18.
- 1264 Rose AB. 2018. Introns as gene regulators: a brick on the accelerator. *Front Genet* **9**: 672.
- 1265 Roth MS, Cokus SJ, Gallaher SD, Walter A, Lopez D, Erickson E, Endelman B, Westcott D, Larabell  
1266 CA, Merchant SS et al. 2017. Chromosome-level genome assembly and transcriptome of  
1267 the green alga *Chromochloris zofingiensis* illuminates astaxanthin production. *Proc Natl*  
1268 *Acad Sci U S A* **114**: E4296-E4305.
- 1269 Salomé PA, Merchant SS. 2019. A Series of fortunate events: Introducing *Chlamydomonas* as a  
1270 reference organism. *Plant Cell* **31**: 1682-1707.
- 1271 Sasso S, Stibor H, Mittag M, Grossman AR. 2018. From molecular manipulation of domesticated  
1272 *Chlamydomonas reinhardtii* to survival in nature. *eLife* **7**.
- 1273 Sharp PM, Li WH. 1987. The codon adaptation index - a measure of directional synonymous  
1274 codon usage bias, and its potential applications. *Nucleic Acids Res* **15**: 1281-1295.
- 1275 Siepel A, Bejerano G, Pedersen JS, Hinrichs AS, Hou M, Rosenbloom K, Clawson H, Spieth J,  
1276 Hillier LW, Richards S et al. 2005. Evolutionarily conserved elements in vertebrate,  
1277 insect, worm, and yeast genomes. *Genome Res* **15**: 1034-1050.
- 1278 Smit AFA, Hubley R. 2008-2015. RepeatModeler Open-1.0. <http://www.repeatmasker.org>.
- 1279 Smit AFA, Hubley R, Green P. 2013-2015. RepeatMasker Open-4.0.  
1280 <http://www.repeatmasker.org>.
- 1281 Smith DR, Lee RW. 2008. Nucleotide diversity in the mitochondrial and nuclear compartments  
1282 of *Chlamydomonas reinhardtii*: investigating the origins of genome architecture. *BMC*  
1283 *Evol Biol* **8**: 156.
- 1284 Stanke M, Diekhans M, Baertsch R, Haussler D. 2008. Using native and syntenically mapped  
1285 cDNA alignments to improve *de novo* gene finding. *Bioinformatics* **24**: 637-644.
- 1286 Stanke M, Schoffmann O, Morgenstern B, Waack S. 2006. Gene prediction in eukaryotes with a  
1287 generalized hidden Markov model that uses hints from external sources. *BMC*  
1288 *Bioinformatics* **7**: 62.
- 1289 Stark A, Lin MF, Kheradpour P, Pedersen JS, Parts L, Carlson JW, Crosby MA, Rasmussen MD,  
1290 Roy S, Deoras AN et al. 2007. Discovery of functional elements in 12 *Drosophila*  
1291 genomes using evolutionary signatures. *Nature* **450**: 219-232.

- 1292 Stein LD, Bao Z, Blasiar D, Blumenthal T, Brent MR, Chen N, Chinwalla A, Clarke L, Clee C,  
1293 Coghlan A et al. 2003. The genome sequence of *Caenorhabditis briggsae*: a platform for  
1294 comparative genomics. *PLoS Biol* **1**: E45.
- 1295 Stevens L, Felix MA, Beltran T, Braendle C, Caurcel C, Fausett S, Fitch D, Frezal L, Gosse C, Kaur T  
1296 et al. 2019. Comparative genomics of 10 new *Caenorhabditis* species. *Evol Lett* **3**: 217-  
1297 236.
- 1298 Strenkert D, Schmollinger S, Gallaher SD, Salome PA, Purvine SO, Nicora CD, Mettler-Altman T,  
1299 Soubeyrand E, Weber APM, Lipton MS et al. 2019. Multiomics resolution of molecular  
1300 events during a day in the life of *Chlamydomonas*. *Proc Natl Acad Sci U S A* **116**: 2374-  
1301 2383.
- 1302 Suh A, Churakov G, Ramakodi MP, Platt RN, 2nd, Jurka J, Kojima KK, Caballero J, Smit AF, Vliet  
1303 KA, Hoffmann FG et al. 2014. Multiple lineages of ancient CR1 retroposons shaped the  
1304 early genome evolution of amniotes. *Genome Biol Evol* **7**: 205-217.
- 1305 Sun Y, Whittle CA, Corcoran P, Johannesson H. 2015. Intron evolution in *Neurospora*: the role of  
1306 mutational bias and selection. *Genome Res* **25**: 100-110.
- 1307 Tang H, Bowers JE, Wang X, Ming R, Alam M, Paterson AH. 2008. Synteny and collinearity in  
1308 plant genomes. *Science* **320**: 486-488.
- 1309 Valli AA, Santos BA, Hnatova S, Bassett AR, Molnar A, Chung BY, Baulcombe DC. 2016. Most  
1310 microRNAs in the single-cell alga *Chlamydomonas reinhardtii* are produced by Dicer-like  
1311 3-mediated cleavage of introns and untranslated regions of coding RNAs. *Genome Res*  
1312 **26**: 519-529.
- 1313 Walker BJ, Abeel T, Shea T, Priest M, Abouelliel A, Sakthikumar S, Cuomo CA, Zeng Q, Wortman  
1314 J, Young SK et al. 2014. Pilon: an integrated tool for comprehensive microbial variant  
1315 detection and genome assembly improvement. *PLoS One* **9**: e112963.
- 1316 Waterhouse RM, Seppey M, Simao FA, Manni M, Ioannidis P, Klioutchnikov G, Kriventseva EV,  
1317 Zdobnov EM. 2018. BUSCO applications from quality assessments to gene prediction  
1318 and phylogenomics. *Mol Biol Evol* **35**: 543-548.
- 1319 Wicker T, Sabot F, Hua-Van A, Bennetzen JL, Capy P, Chalhoub B, Flavell A, Leroy P, Morgante  
1320 M, Panaud O et al. 2007. A unified classification system for eukaryotic transposable  
1321 elements. *Nat Rev Genet* **8**: 973-982.
- 1322 Williamson RJ, Josephs EB, Platts AE, Hazzouri KM, Haudry A, Blanchette M, Wright SI. 2014.  
1323 Evidence for widespread positive and negative selection in coding and conserved  
1324 noncoding regions of *Capsella grandiflora*. *PLoS Genet* **10**: e1004622.
- 1325 Yamamoto K, Kawai-Toyooka H, Hamaji T, Tsuchikane Y, Mori T, Takahashi F, Sekimoto H, Ferris  
1326 PJ, Nozaki H. 2017. Molecular evolutionary analysis of a gender-limited *MID* ortholog  
1327 from the homothallic species *Volvox africanus* with male and monoecious spheroids.  
1328 *PLoS One* **12**: e0180313.
- 1329 Zhang C, Rabiee M, Sayyari E, Mirarab S. 2018. ASTRAL-III: polynomial time species tree  
1330 reconstruction from partially resolved gene trees. *BMC Bioinformatics* **19**.
- 1331



Table 1. Genome assembly metrics for eight high-quality core-*Reinhardtinia* genome assemblies.

| <b>Species</b>                                       | <i>Chlamydomonas reinhardtii</i> v5 | <i>Chlamydomonas incerta</i> | <i>Chlamydomonas schloesseri</i> | <i>Edaphochlamys debaryana</i> | <i>Gonium pectorale</i> | <i>Yamagishiella unicocca</i> | <i>Eudorina. sp.</i> 2016-703-Eu-15 | <i>Volvox carteri</i> v2 |
|------------------------------------------------------|-------------------------------------|------------------------------|----------------------------------|--------------------------------|-------------------------|-------------------------------|-------------------------------------|--------------------------|
| <b>Assembly level</b>                                | chromosome                          | contig                       | contig                           | contig                         | scaffold                | contig                        | scaffold                            | scaffold                 |
| <b>Genome size (Mb)</b>                              | 111.10                              | 129.24                       | 130.20                           | 142.14                         | 148.81                  | 134.23                        | 184.03                              | 131.16                   |
| <b>Number of contigs/scaffolds</b>                   | 17*                                 | 453                          | 457                              | 527                            | 2373                    | 1461                          | 3180                                | 434                      |
| <b>N50 (Mb)</b>                                      | 7.78                                | 1.58                         | 1.21                             | 0.73                           | 1.27                    | 0.67                          | 0.56                                | 2.60                     |
| <b>Contig N50 (Mb)</b>                               | 0.22                                | 1.58                         | 1.21                             | 0.73                           | 0.02                    | 0.67                          | 0.30                                | 0.09                     |
| <b>L50</b>                                           | 7                                   | 24                           | 30                               | 56                             | 30                      | 53                            | 83                                  | 15                       |
| <b>Contig L50</b>                                    | 141                                 | 24                           | 30                               | 56                             | 1871                    | 53                            | 155                                 | 410                      |
| <b>GC (%)</b>                                        | 64.1                                | 66.0                         | 64.4                             | 67.1                           | 64.5                    | 61.0                          | 61.4                                | 56.1                     |
| <b>TEs &amp; satellites (Mb / %)</b>                 | 15.33 / 13.80                       | 26.75 / 20.70                | 27.48 / 21.11                    | 20.05 / 14.11                  | 11.65 / 7.83            | 29.57 / 22.03                 | 46.81 / 25.43                       | 22.22 / 16.94            |
| <b>Simple &amp; low complexity repeats (Mb / %)</b>  | 8.71 / 7.84                         | 8.57 / 7.72                  | 10.19 / 9.17                     | 6.40 / 5.76                    | 4.15 / 3.74             | 6.55 / 4.88                   | 15.15 / 8.23                        | 6.45 / 5.80              |
| <b>BUSCO genome mode (complete % / fragmented %)</b> | 96.5 / 1.7                          | 96.5 / 1.6                   | 96.1 / 1.7                       | 94.0 / 1.9                     | 86.3 / 4.5              | 95.9 / 2.2                    | 94.7 / 2.7                          | 95.9 / 2.4               |

\*17 chromosomes + 37 unassembled scaffolds.

BUSCO was run using the Chlorophyta odb10 dataset. See table S3 for complete BUSCO results.



Table 2. Gene annotation metrics for core-*Reinhardtinia* species.

| Species                                               | <i>Chlamydomonas reinhardtii</i> v5.6* | <i>Chlamydomonas incerta</i> | <i>Chlamydomonas schloesseri</i> | <i>Edaphochlamys debaryana</i> | <i>Gonium pectorale</i> | <i>Volvox carteri</i> v2.1 |
|-------------------------------------------------------|----------------------------------------|------------------------------|----------------------------------|--------------------------------|-------------------------|----------------------------|
| <b>Number of genes</b>                                | 16,656                                 | 16,350                       | 15,571                           | 19,228                         | 16,290                  | 14,247                     |
| <b>Number of transcripts</b>                          | 18,311                                 | 16,957                       | 16,268                           | 20,450                         | 16,290                  | 16,075                     |
| <b>Gene coverage (Mb / %)</b>                         | 91.22 / 82.10                          | 94.42 / 73.06                | 94.29 / 73.42                    | 103.13 / 72.55                 | 65.04 / 43.71           | 84.00 / 64.04              |
| <b>UTR coverage (Mb / %)</b>                          | 3.88 / 15.59                           | 4.04 / 11.22                 | 3.37 / 9.23                      | 4.24 / 9.31                    | 0 / 0                   | 3.00 / 11.55               |
| <b>Mean intron number</b>                             | 7.81                                   | 8.58                         | 7.67                             | 9.31                           | 6.15                    | 6.73                       |
| <b>Median intron length (bp)</b>                      | 229                                    | 225                          | 244                              | 198                            | 310                     | 343                        |
| <b>Median intergenic distance (bp)</b>                | 134                                    | 341                          | 408                              | 555                            | 2372                    | 905                        |
| <b>BUSCO protein mode (complete % / fragmented %)</b> | 96.1 / 2.3                             | 91.1 / 5.9                   | 94.7 / 3.0                       | 94.1 / 4.0                     | 81.5 / 12.9             | 94.7 / 2.0                 |

\* *C. reinhardtii* annotation is based on a customised repeat-filtered version of the v5.6 annotation (see Methods).

Intron metrics are based only on introns within coding sequence, to avoid differences caused by the quality of UTR annotation. BUSCO was run using the Chlorophyta odb10 dataset. See table S4 for complete BUSCO results.

Table 3. Overlap between conserved elements and *C. reinhardtii* genomic site classes.

| Site class               | CE overlap (Mb) | Proportion of CE bases (%) | Proportion of site class (%) | Genetic diversity all sites ( $\pi$ ) | Genetic diversity CE sites ( $\pi$ ) | Genetic diversity non-CE sites ( $\pi$ ) |
|--------------------------|-----------------|----------------------------|------------------------------|---------------------------------------|--------------------------------------|------------------------------------------|
| CDS                      | 23.85           | 70.64                      | 63.10                        | 0.0144                                | 0.0112                               | 0.0204                                   |
| 5' UTR                   | 0.97            | 2.86                       | 24.76                        | 0.0189                                | 0.0138                               | 0.0208                                   |
| 3' UTR                   | 1.48            | 4.38                       | 10.97                        | 0.0205                                | 0.0151                               | 0.0213                                   |
| intronic                 | 6.76            | 20.01                      | 19.15                        | 0.0248                                | 0.0216                               | 0.0256                                   |
| intergenic <250 bp       | 0.13            | 0.38                       | 14.07                        | 0.0229                                | 0.0194                               | 0.0235                                   |
| intergenic $\geq$ 250 bp | 0.56            | 1.65                       | 3.55                         | 0.0137                                | 0.0134                               | 0.0138                                   |

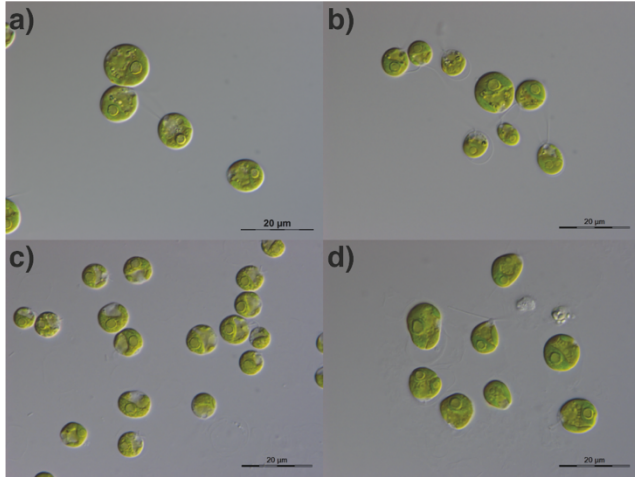

Figure 1. Images of unicellular species. a) *Chlamydomonas reinhardtii*. b) *Chlamydomonas incerta* SAG 7.73. c) *Chlamydomonas schloesseri* SAG 2486 (=CCAP 11/173). d) *Edaphochlamys debaryana* SAG 11.73 (=CCAP 11/70). All images taken by Thomas Pröschold.

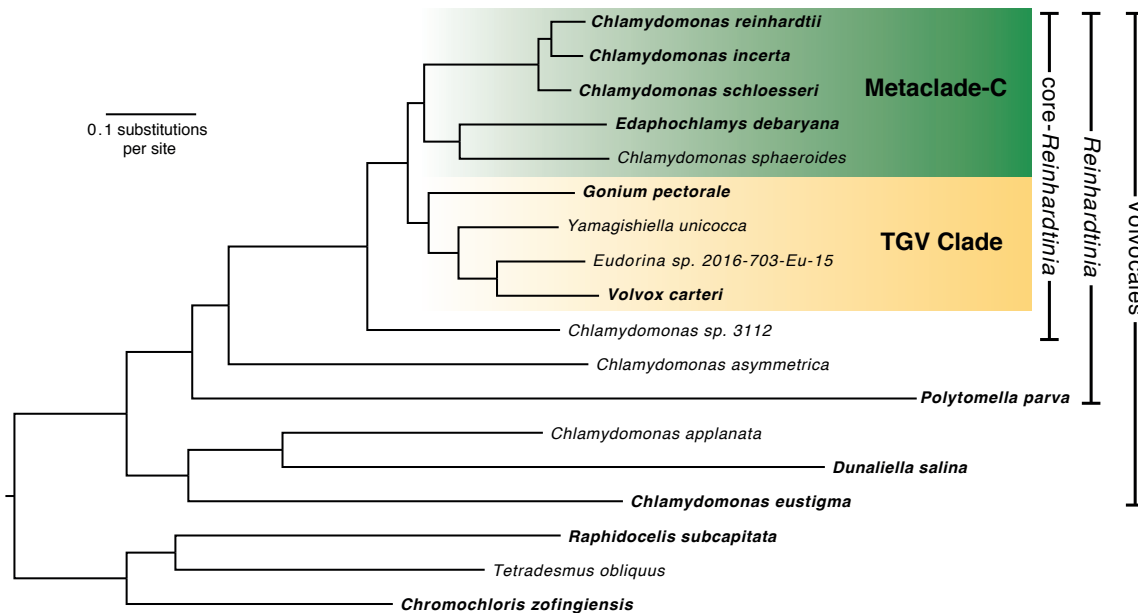

Figure 2. ML phylogeny of 15 Volvocales species and three outgroups inferred using LG+F+R6 model and concatenated protein alignment of 1,624 chlorophyte BUSCO genes. All bootstrap values  $\geq 99\%$ . Species in bold have gene model annotations and were included in the OrthoFinder-based phylogenies (fig. S3b, c).

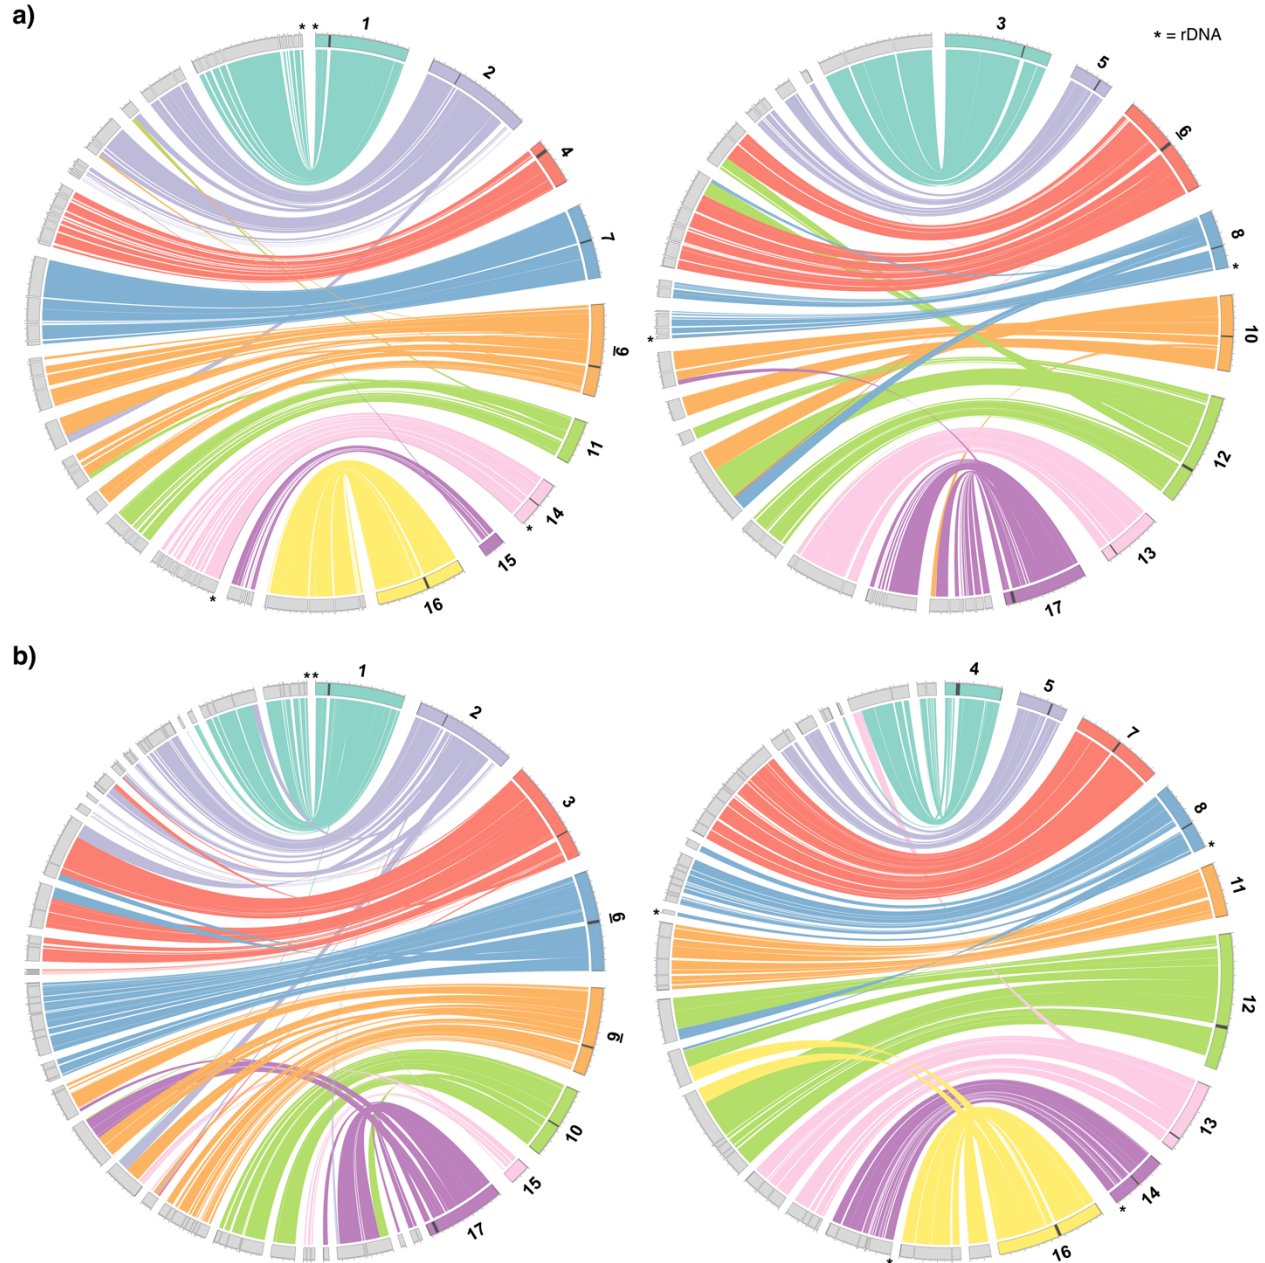

Figure 3. Circos plot (Krzywinski *et al.* 2009) representation of syntenic blocks shared between a) *C. reinhardtii* and *C. incerta*, and b) *C. reinhardtii* and *C. schloesseri*. *C. reinhardtii* chromosomes are represented as coloured bands, and *C. incerta* / *C. schloesseri* contigs as grey bands. Contigs are arranged and orientated relative to *C. reinhardtii* chromosomes, and adjacent contigs with no signature of rearrangement relative to *C. reinhardtii* are plotted without gaps. Dark grey bands highlight putative *C. reinhardtii* centromeres, and asterisks represent rDNA. Note that colours representing specific chromosomes differ between a) and b).

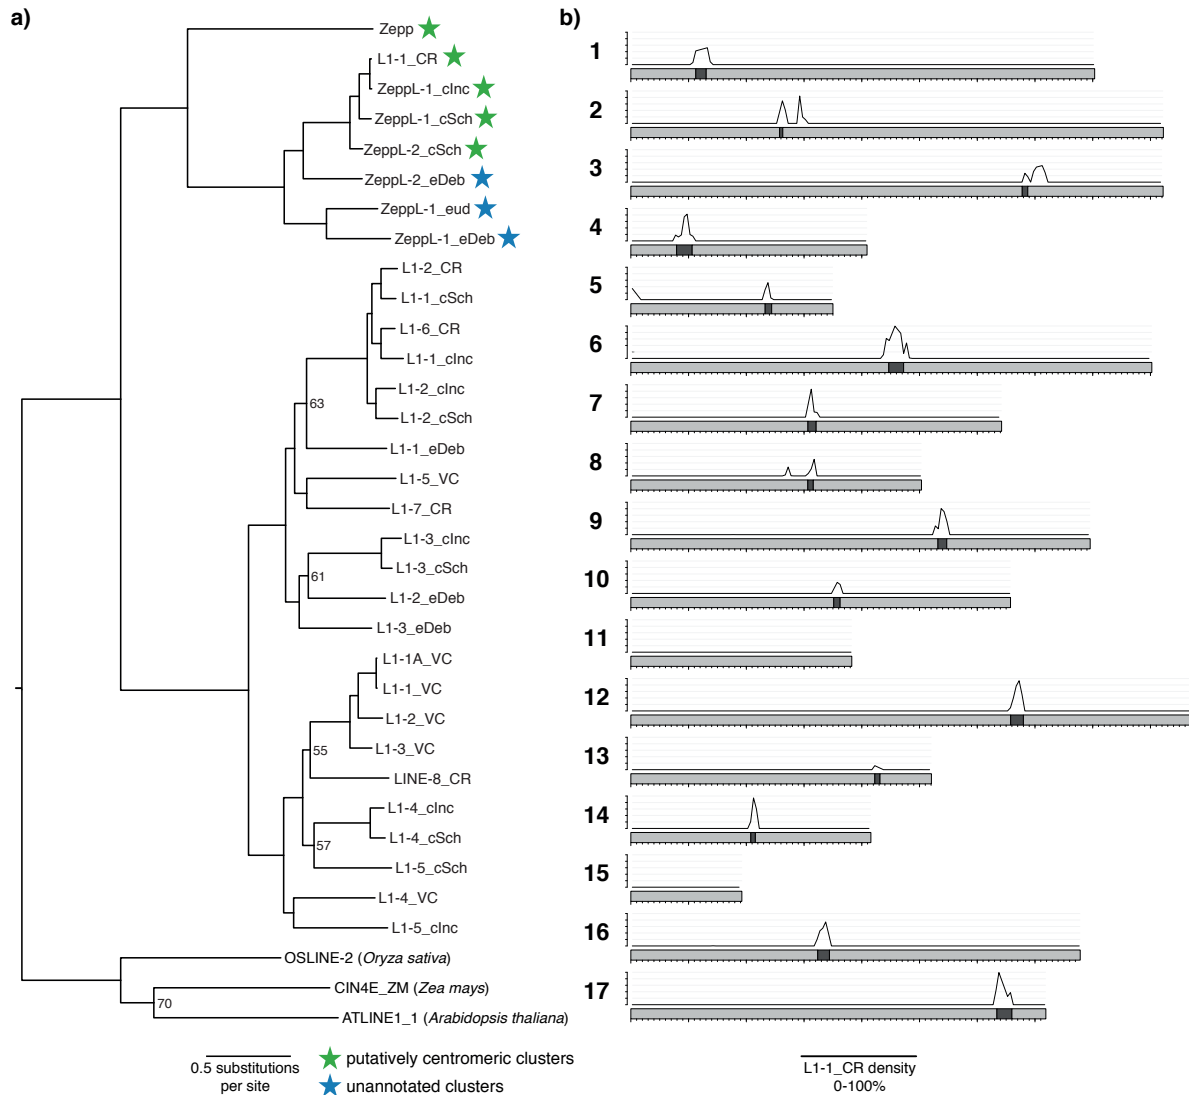

Figure 4. a) ML phylogeny of chlorophyte L1 LINE elements inferred using the LG+F+R6 model and alignment of endonuclease and reverse transcriptase protein domains. Bootstrap values  $\leq 70\%$  are shown. Species are given by the element name suffix as follows: \_CR = *C. reinhardtii*, \_VC = *V. carteri*, \_cInc = *C. incerta*, \_cSch = *C. schloesseri*, \_eDeb = *E. debaryana*, \_eud = *Eudorina* sp. 2016-703-Eu-15. b) Density (0-100%) of L1-1\_CR in 50 kb windows across *C. reinhardtii* chromosomes. Dark bands represent putative centromeres, x-axis ticks represent 100 kb increments and y-axis ticks represent 20% increments. Plot produced using karyoploteR (Gel and Serra 2017).

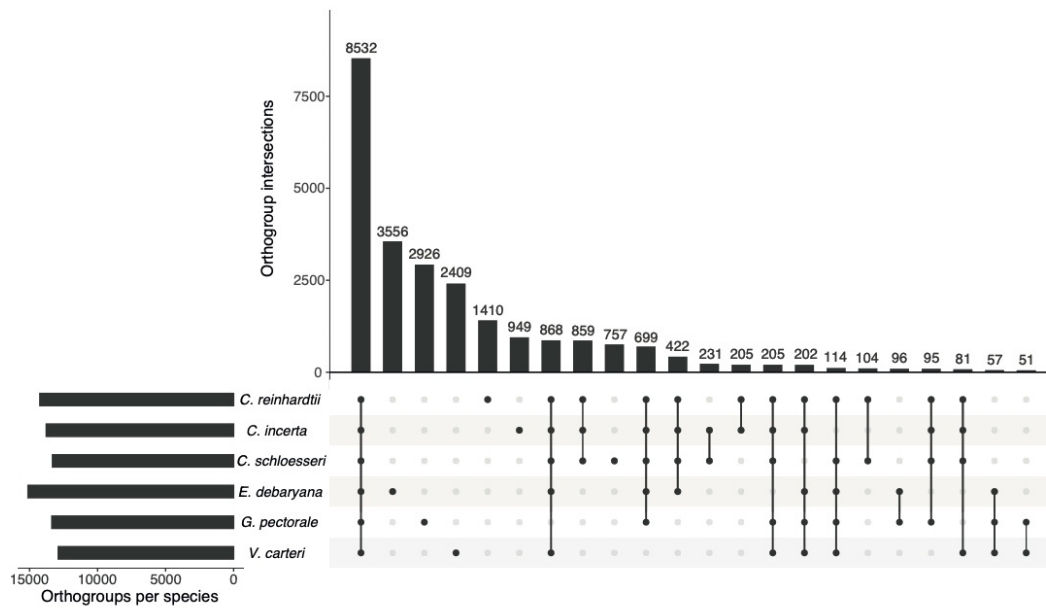

Figure 5. Upset plot (Lex et al. 2014) representing the intersection of orthogroups between six core-*Reinhardtinia* species. Numbers above bars represent the number of orthogroups shared by a given intersection of species.

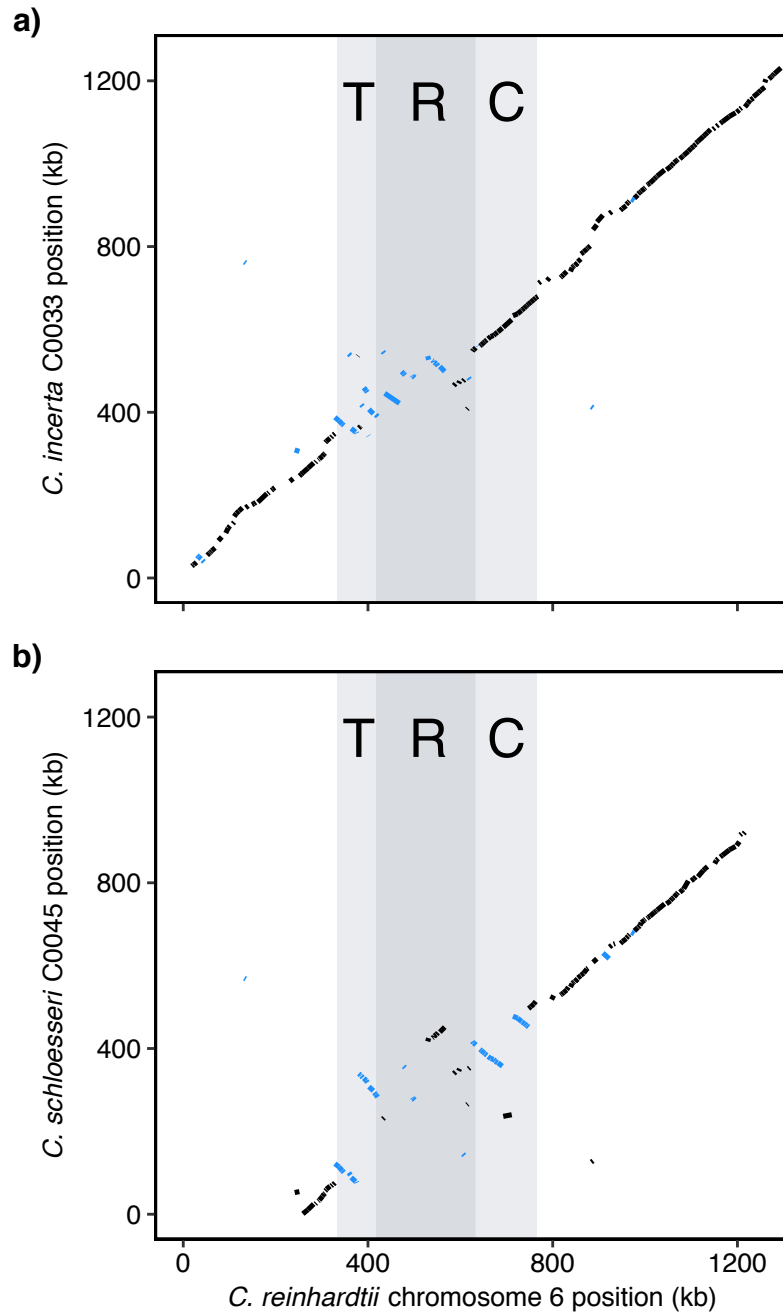

Figure 6. Synteny representation between genes of the *C. reinhardtii* MT- haplotype and flanking autosomal sequence, and a) inferred *C. incerta* MT- haplotype and flanking sequence genes (contig C0033), or b) inferred *C. schloesseri* MT- haplotype and flanking sequence genes (contig C0045). The T, R and C domains of the *C. reinhardtii* MT- are highlighted. Note that C0045 does not contain the initial ~260 kb of chromosome 6.



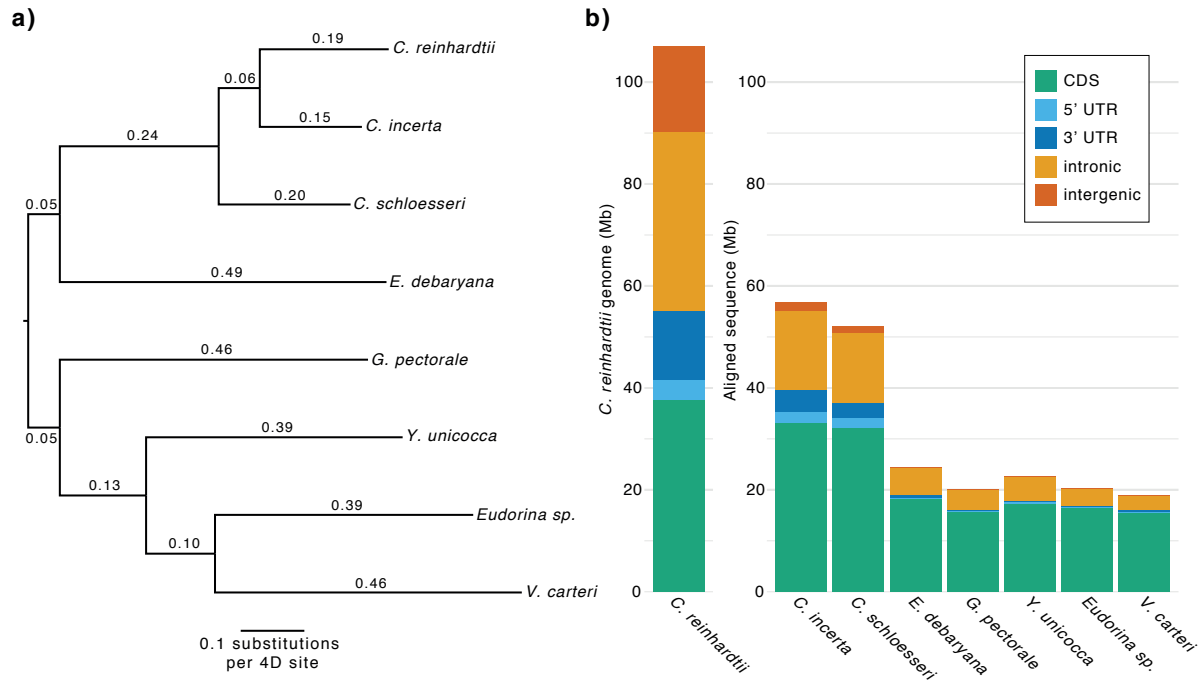

Figure 7. a) Estimates of putatively neutral divergence under the GTR model, based on the topology of figure 2 and 1,552,562 *C. reinhardtii* 4D sites extracted from the Cactus WGA. b) A representation of the *C. reinhardtii* genome by site class, and the number of aligned sites per *C. reinhardtii* site class for each other species in the Cactus WGA.

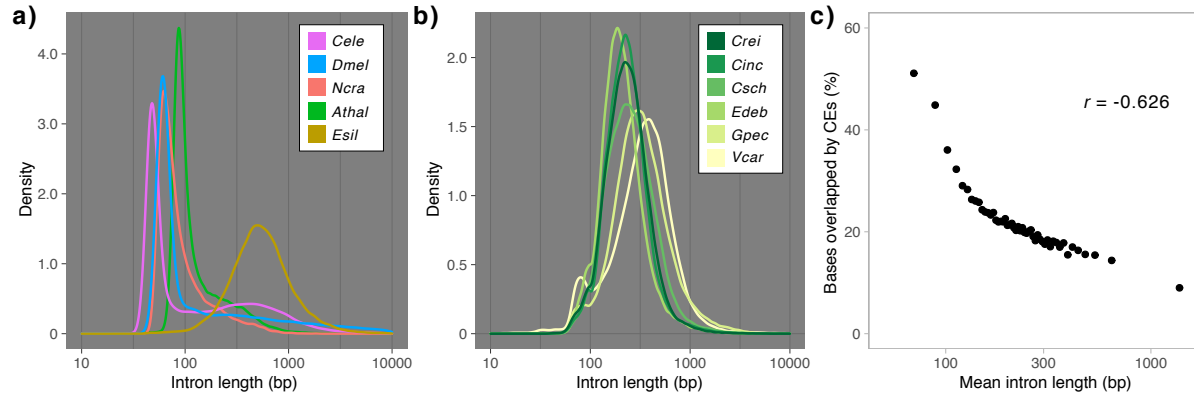

Figure 8. a) Intron length distributions for five model organisms (*Cele* = *C. elegans*, *Dmel* = *D. melanogaster*, *Ncra* = *Neurospora crassa*, *Athal* = *A. thaliana*, *Esil* = *Ectocarpus siliculosus*). The brown alga *E. siliculosus* is included as an example of an atypical distribution. b) Intron length distributions for six core-*Reinhardtia* species, note different y-axis scale (*Crei* = *C. reinhardtii*, *Cinc* = *C. incerta*, *Csch* = *C. schloesseri*, *Edeb* = *Edaphochlamys debaryana*, *Gpec* = *G. pectorale*, *Vcar* = *V. carteri*). c). Correlation between mean intron length per bin and the proportion of bases overlapped by CEs. Introns were ordered by length and separated into 50 bins, so that each bin contained the same number of introns.

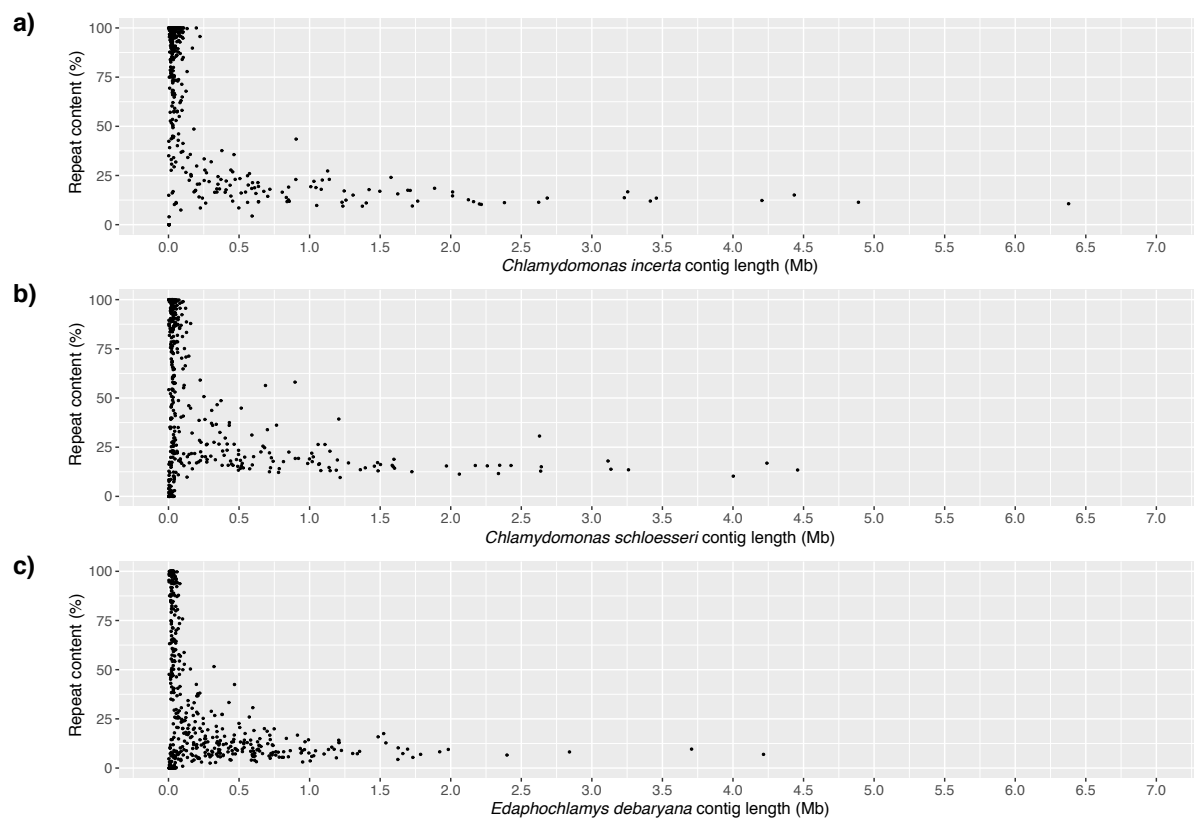

Figure S1. Total repeat content per contig (TEs, satellites and simple/low-complexity repeats) plotted by contig length for a) *Chlamydomonas incerta*, b) *Chlamydomonas schloesseri*, and c) *Edaphochlamys debaryana*.

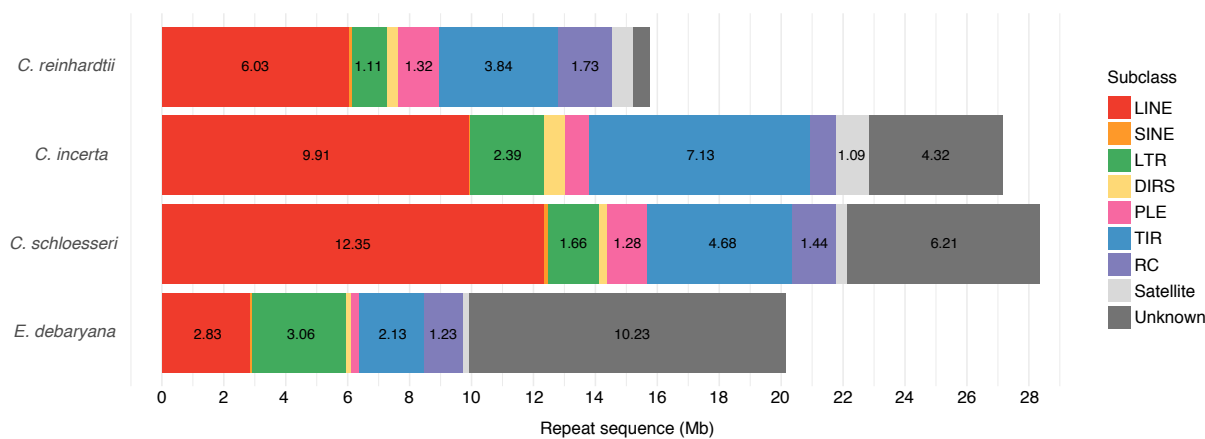

Figure S2. Repeat content per species by repeat subclass. Numbers within bars represent total sequence per subclass in Mb. LINE = long interspersed nuclear element, SINE = short interspersed nuclear element, LTR = long terminal repeat, DIRS = tyrosine recombinase encoding retrotransposons, PLE = Penelope-like elements, TIR = terminal inverted repeat (i.e. DNA transposons), RC = rolling-circle elements.

a)

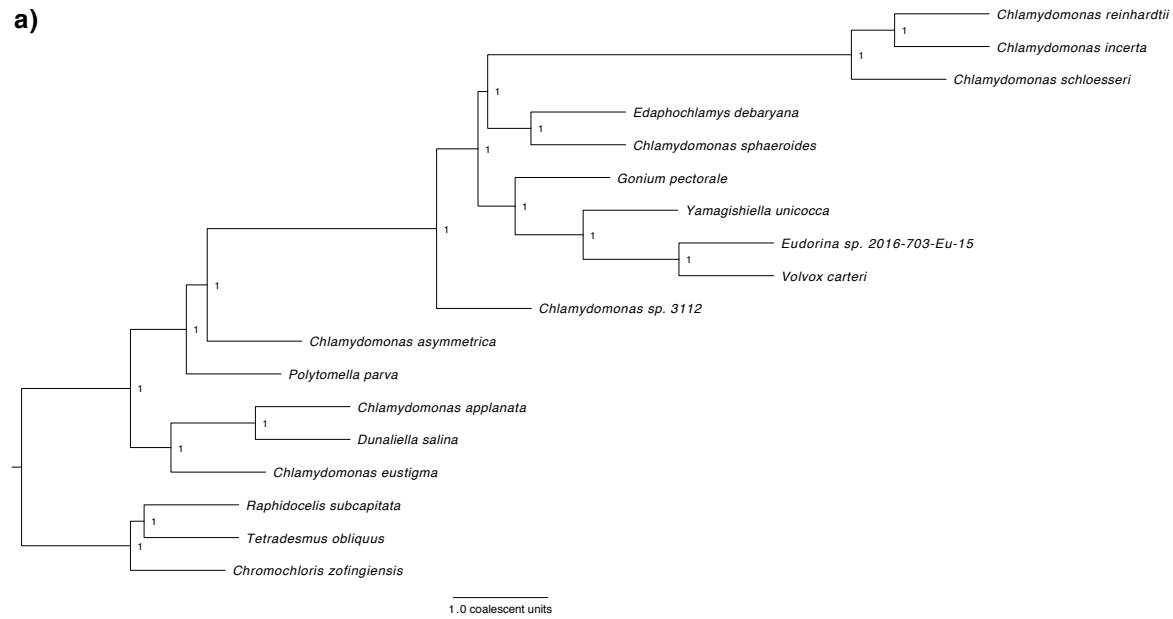

b)

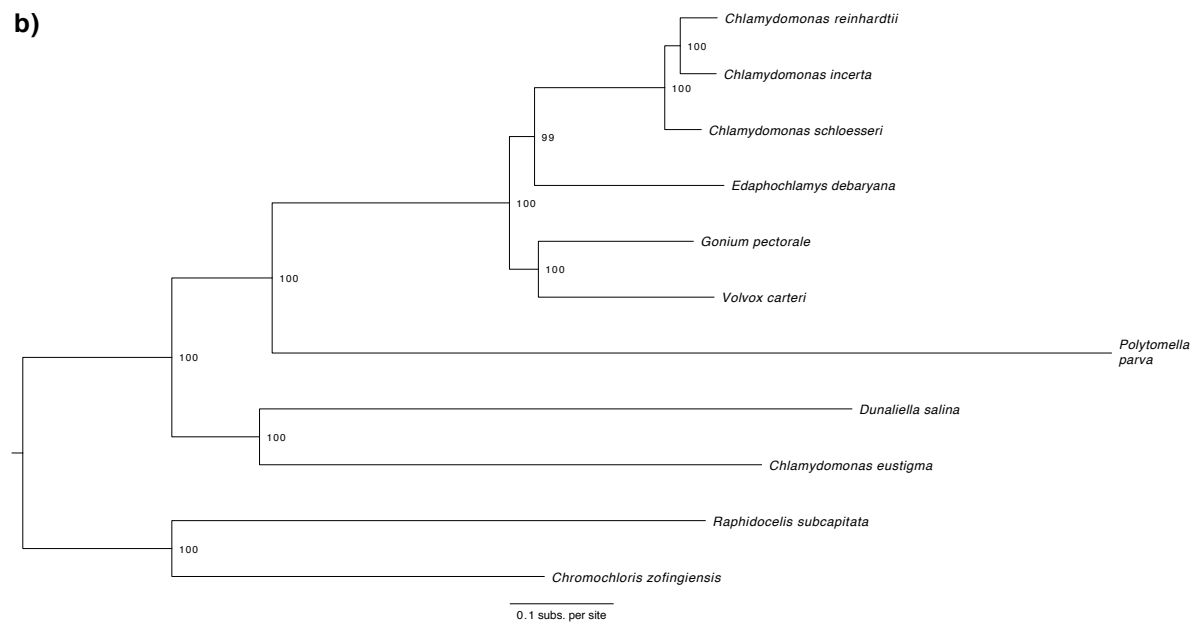

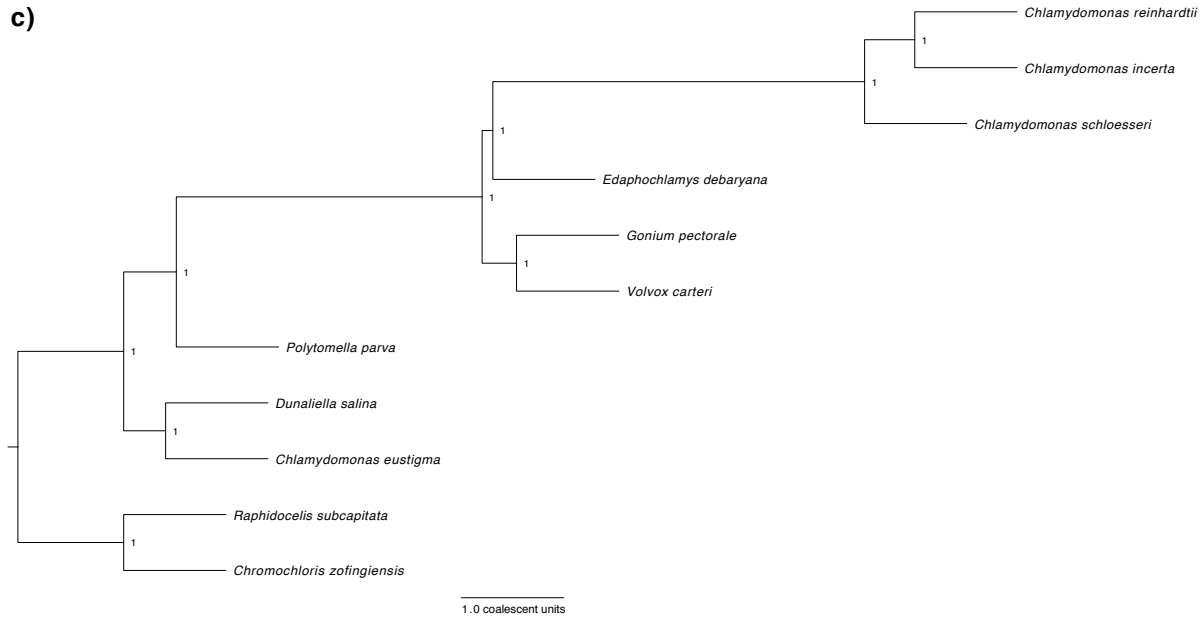

Figure S3. Phylogenomic analyses. a) ASTRAL-III species tree (15 Volvocales species and three outgroups) summarising 1,624 gene trees produced from individual protein alignments of chlorophyte BUSCO genes. b) ML phylogeny of nine Volvocales species and two outgroups inferred using LG+F+R5 model and a concatenated protein alignment of 1,681 putative single-copy orthologs identified by OrthoFinder. c) ASTRAL-III species tree summarising 1,681 gene trees produced from individual protein alignments of the OrthoFinder single-copy genes.

a)

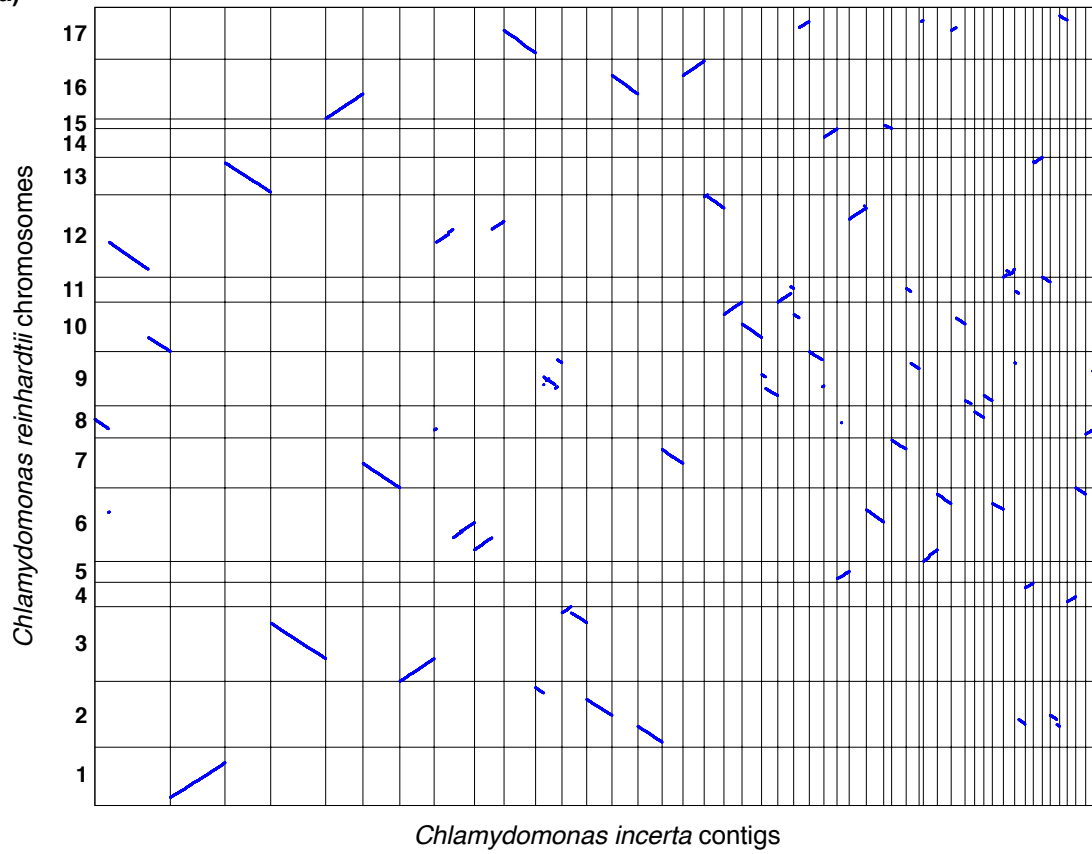



b)

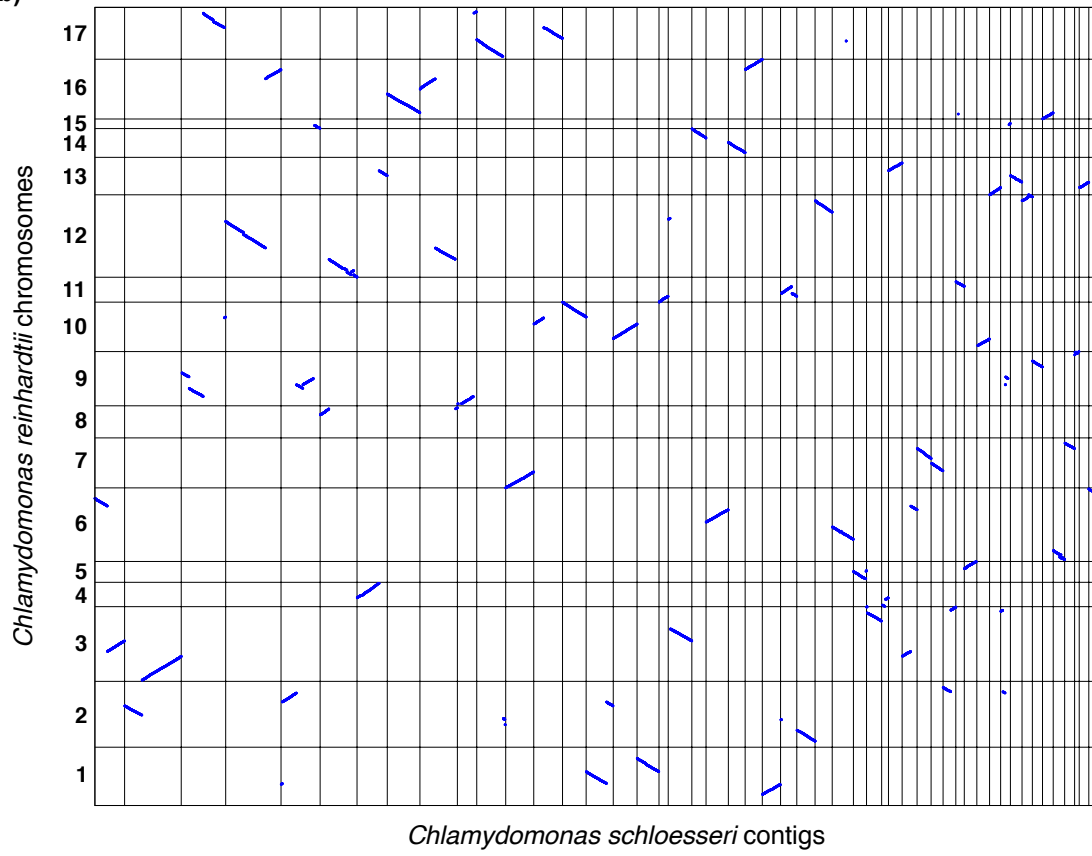

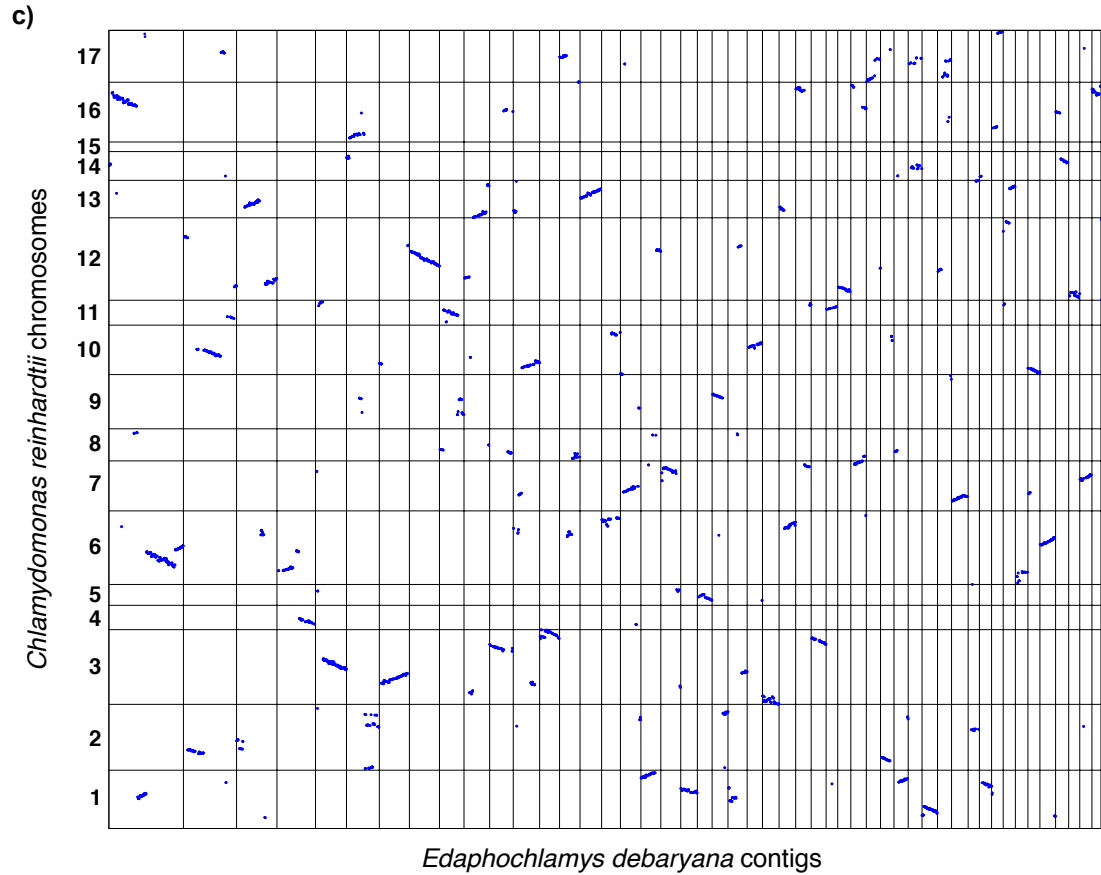

Figure S4. Dotplots representing syntenic genomic segments identified between *C. reinhardtii* and 50 largest contigs of a) *Chlamydomonas incerta*, b) *Chlamydomonas schloesseri*, and c) *Edaphochlamys debaryana*.

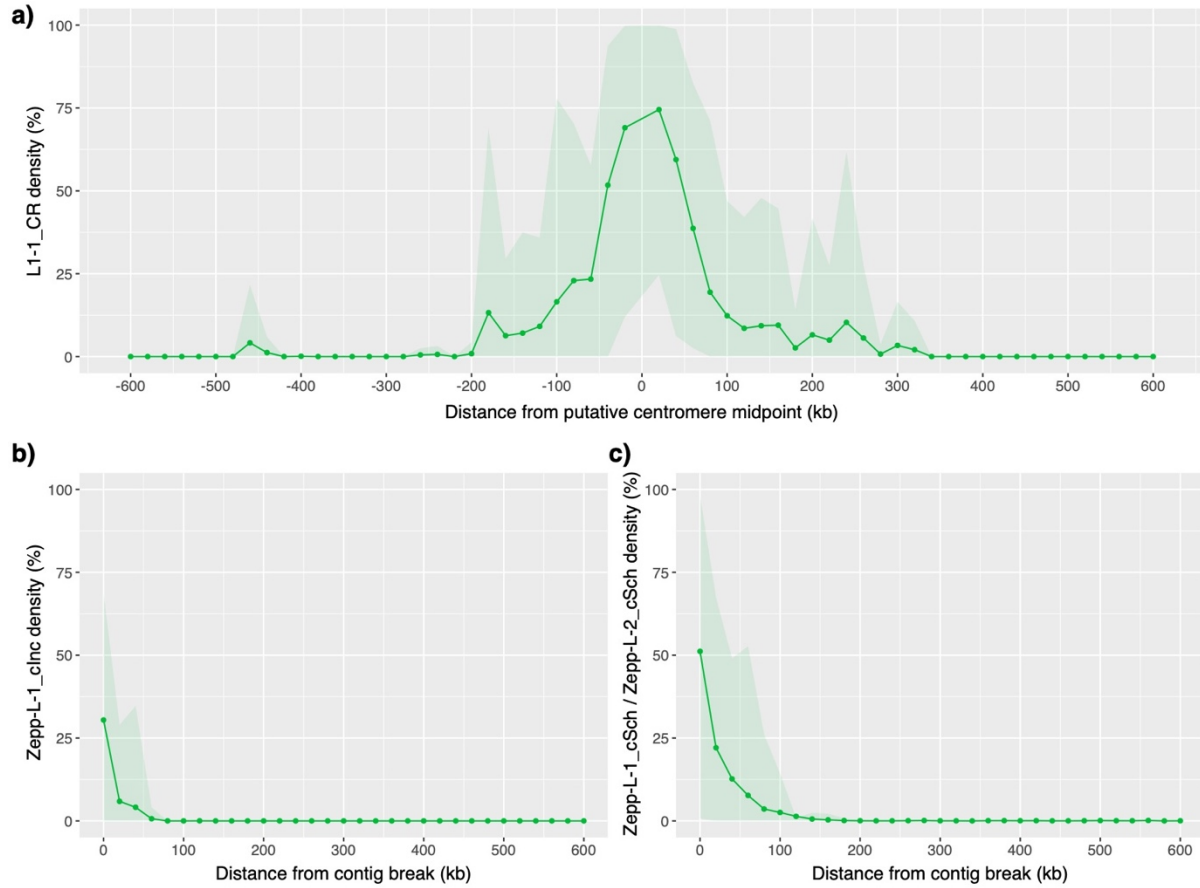

Figure S5. Mean densities of Zepp-like L1 LINE elements per 20 kb windows averaged over relevant chromosomes/contigs. Shaded areas represent 95% quantiles. a) Density of L1-1\_CR elements relative to midpoint of 15 putative *C. reinhardtii* centromeres. b) Density of ZeppL-1\_cInc elements relative to *C. incerta* contig ends syntenic to *C. reinhardtii* putative centromeres. c) Density of ZeppL-1\_cSch and ZeppL-2\_cSch elements relative to *C. schloesseri* contig ends syntenic to *C. reinhardtii* putative centromeres.

a)

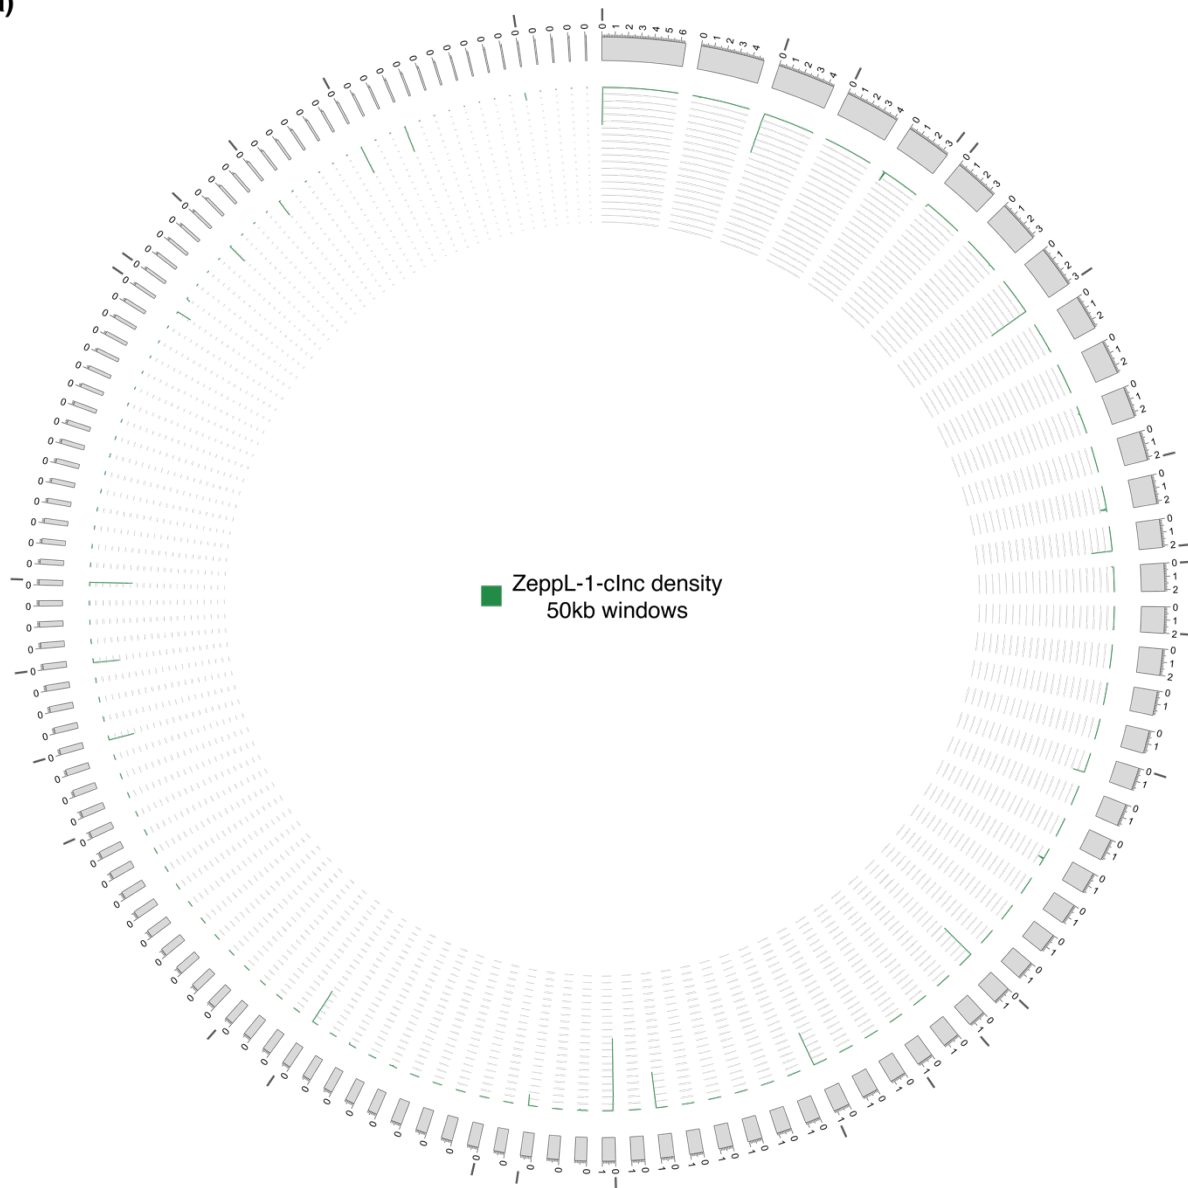

b)

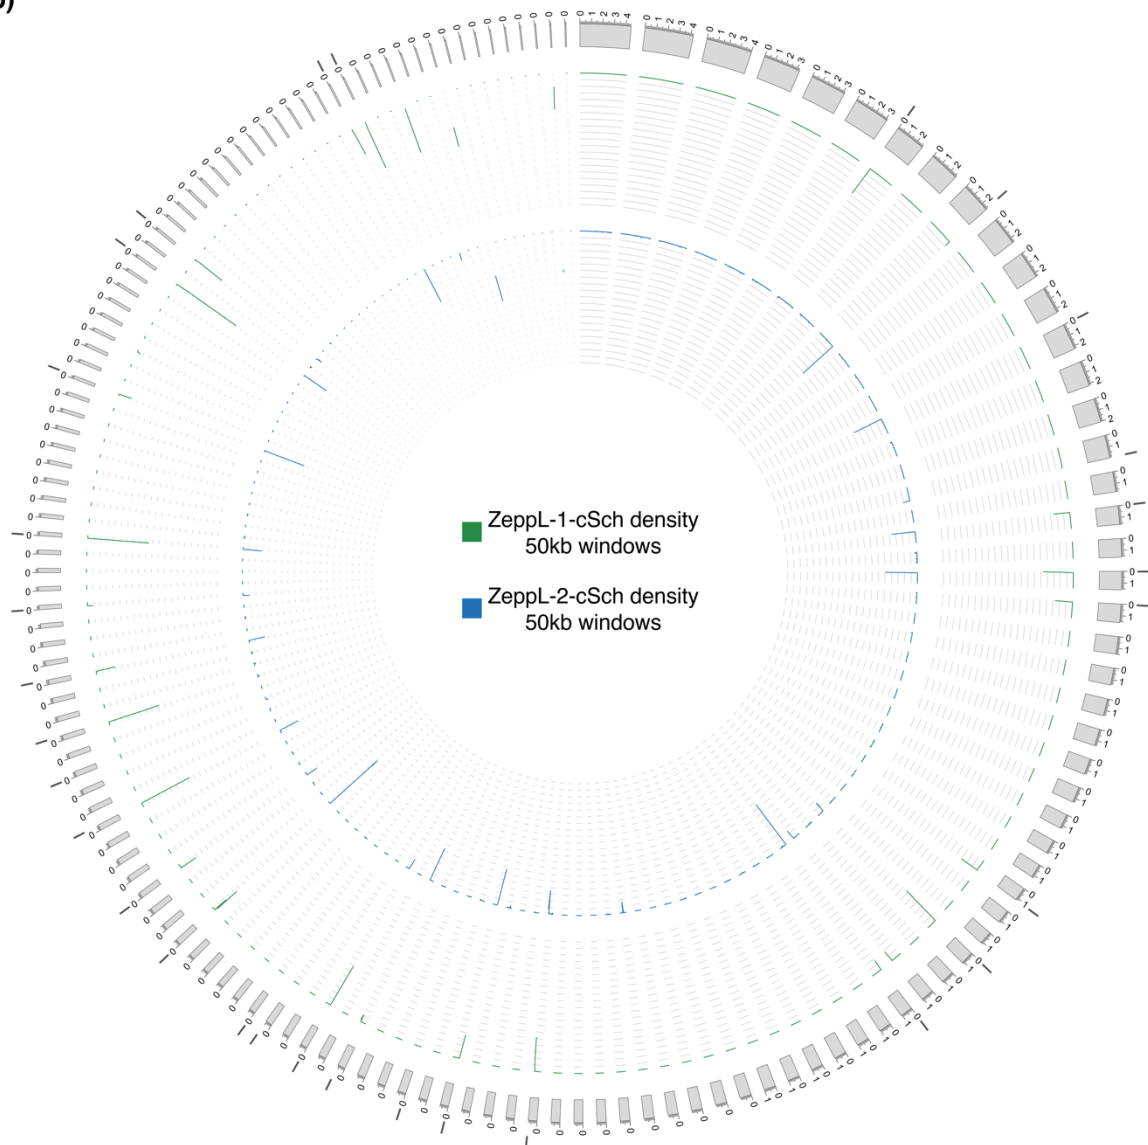

c)

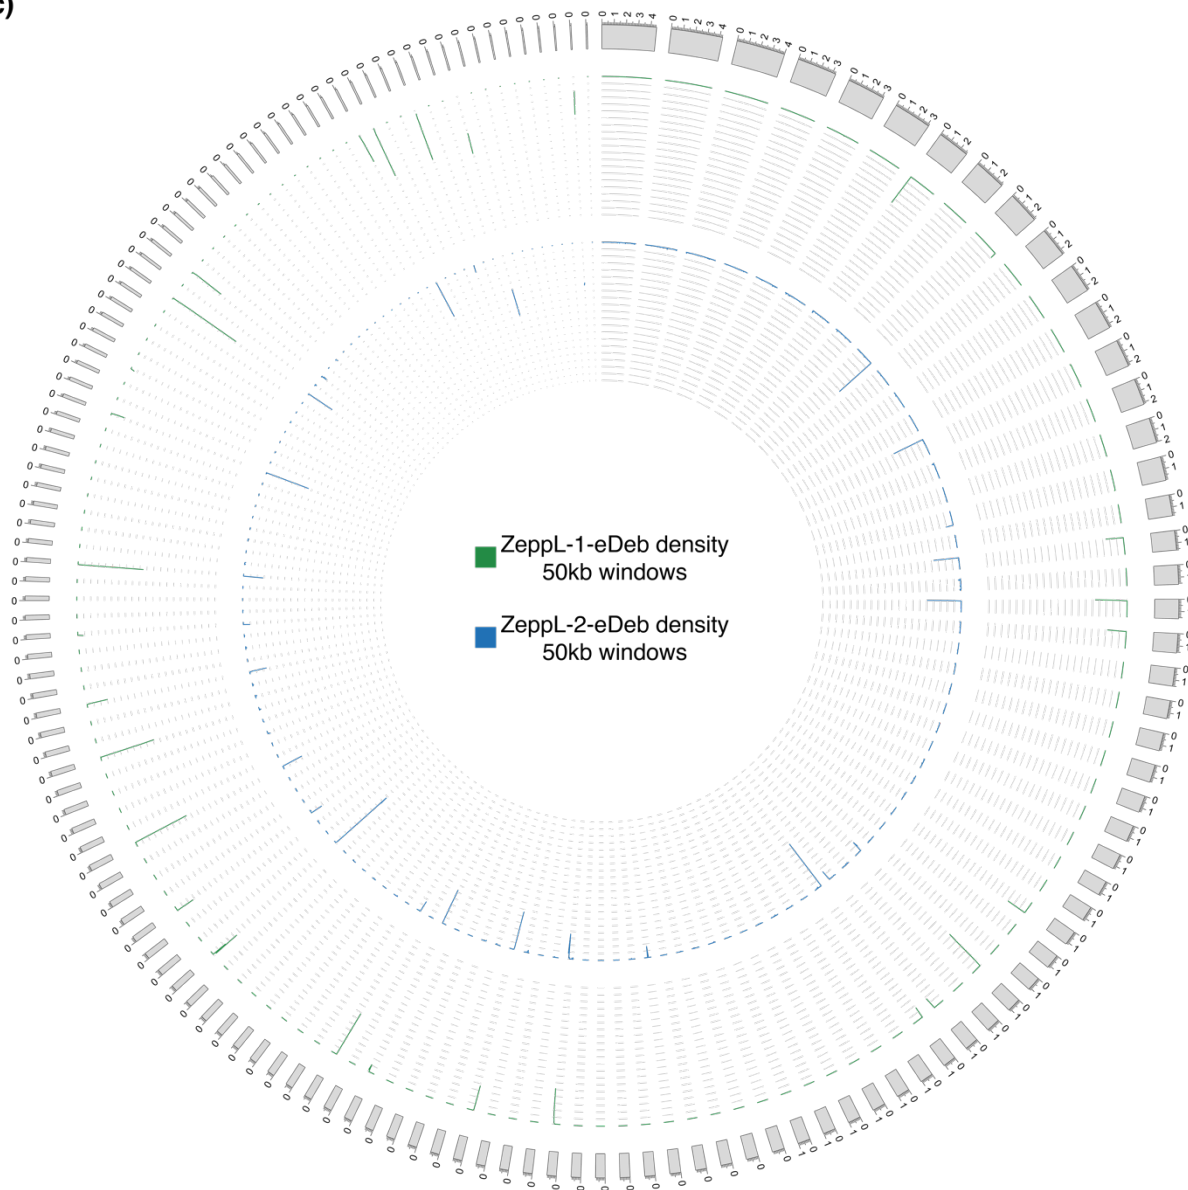

d)

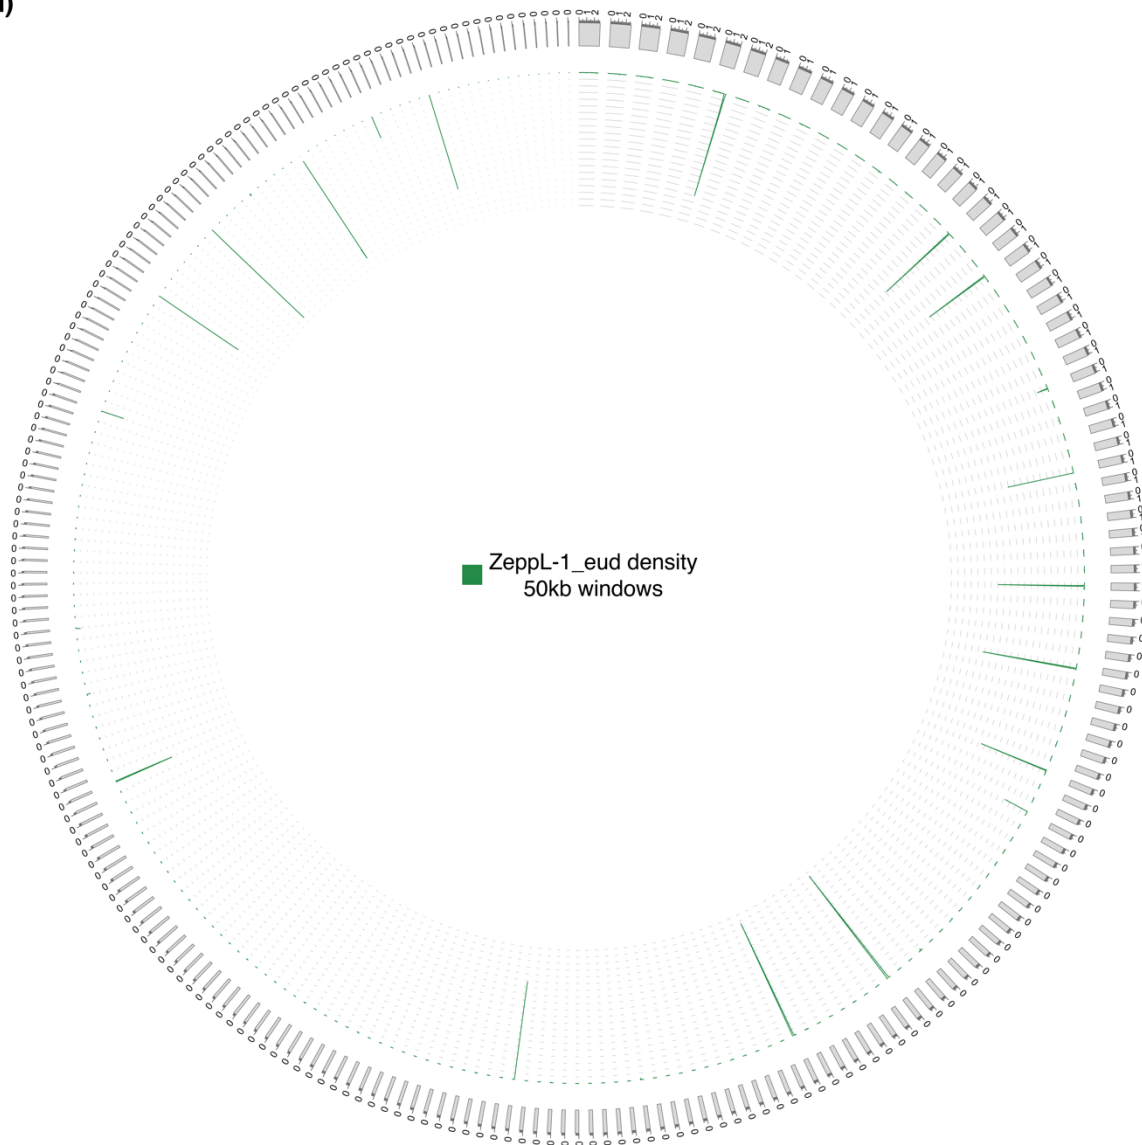

Figure S6. Genome-wide density of Zepp-like elements. Contigs are represented by grey bands and ordered by size. Dark grey bars above/below contigs represent contig ends inferred as syntenic with *C. reinhardtii* centromeres. Axis ranges from 0-100%. a) *Chlamydomonas incerta*. b) *Chlamydomonas schloesseri*. c) *Edaphochlamys debaryana*. d) *Eudorina sp. 2016-703-Eu-15*.



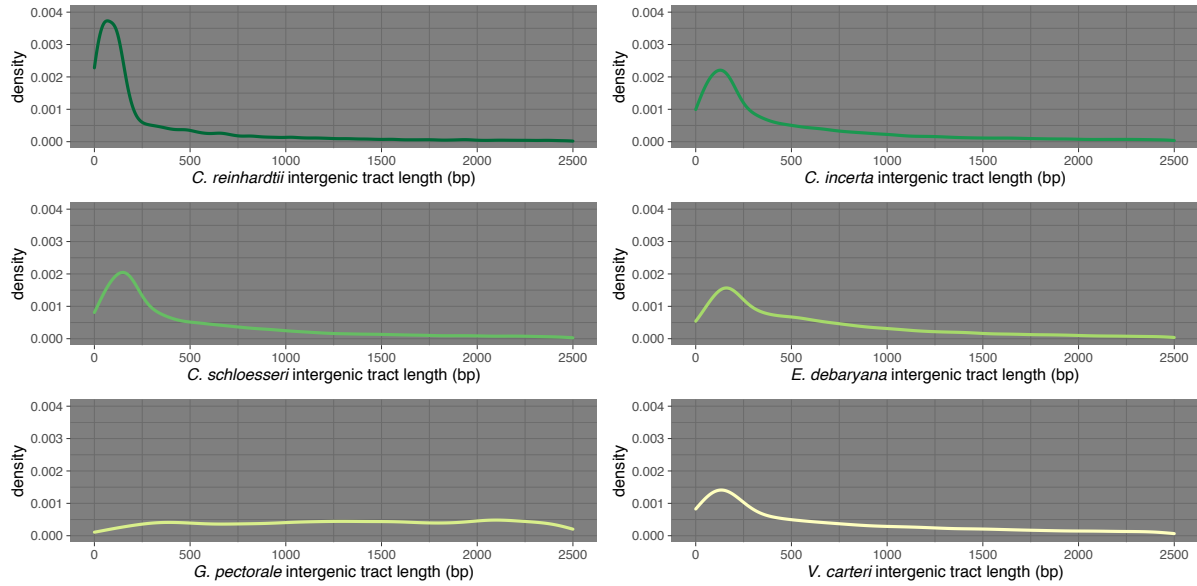

Figure S7. Distribution of intergenic tract lengths across six core-*Reinhardtinia* species. *G. pectorale* distribution differs due to the lack of UTR annotation for this species.

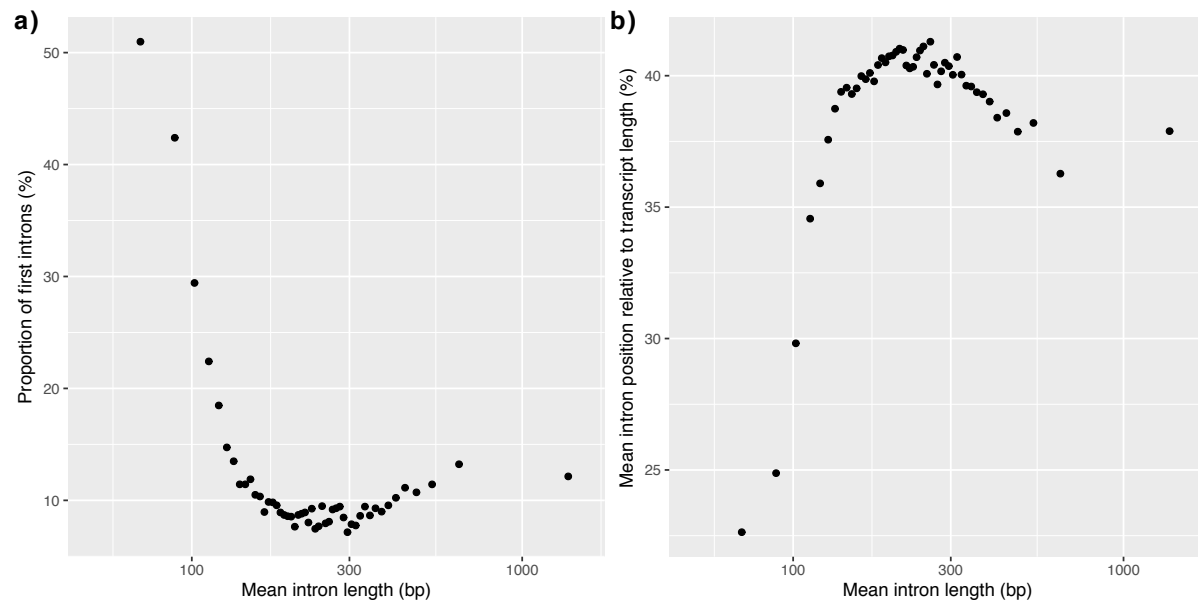

Figure S8. a) Relationship between the proportion of introns that are the first intron of a gene and the mean intron length per bin (see main text). b) The relationship between the mean intron position relative to transcript length (e.g. an intron at position 500 of a 2000 bp transcript equals 25%) and mean intron length per bin.
